# Supplementary material for: Integrin β4 promotes DNA damage-related drug resistance in triple-negative breast cancer via TNFAIP2/IQGAP1/RAC1
Source: bioRxiv preprint, doi:10.1101/2023.04.17.537130, version 2 (2023-06-14)
Supplement: supplementary table 1 [file 537130_file08.xlsx]

## Sheet: proteinGroups
Protein IDs	Majority protein IDs	Protein names	Gene names	Number of proteins	Peptides	Unique peptides	Peptides sample 1	Peptides sample 2	Peptides sample 3	Peptides sample 4	Peptides sample 5	Peptides sample 6	Peptides sample 7	Peptides sample 8	Unique peptides sample 1	Unique peptides sample 2	Unique peptides sample 3	Unique peptides sample 4	Unique peptides sample 5	Unique peptides sample 6	Unique peptides sample 7	Unique peptides sample 8	Sequence coverage [%]	Unique sequence coverage [%]	Mol. weight [kDa]	Sequence length	Score	Sequence coverage sample 1 [%]	Sequence coverage sample 2 [%]	Sequence coverage sample 3 [%]	Sequence coverage sample 4 [%]	Sequence coverage sample 5 [%]	Sequence coverage sample 6 [%]	Sequence coverage sample 7 [%]	Sequence coverage sample 8 [%]	Intensity	Intensity sample 1	Intensity sample 2	Intensity sample 3	Intensity sample 4	Intensity sample 5	Intensity sample 6	Intensity sample 7	Intensity sample 8
Q03169;H0YLC0;H0YKR7;H0YKI8;H0YM45	Q03169	Tumor necrosis factor alpha-induced protein 2	TNFAIP2	5	53	53	22	40	25	36	30	16	18	53	22	40	25	36	30	16	18	53	64.5	64.5	72.66	654	323.31	35.3	59.2	36.4	56.7	49.7	26.5	25.2	64.5	715350000000	1314600000	13733000000	1115100000	6000500000	3183600000	828630000	775290000	688400000000
P15924	P15924	Desmoplakin	DSP	1	50	50	9	21	30	6	6	21	17	0	9	21	30	6	6	21	17	0	16.5	16.5	331.77	2871	323.31	3	6.7	10.4	2.1	1.9	7.2	5.6	0	982570000	64252000	273370000	242920000	27724000	34102000	215490000	124710000	0
P35527;CON__P35527;K7EQQ3	P35527;CON__P35527;K7EQQ3	Keratin, type I cytoskeletal 9	KRT9	3	40	39	26	34	35	21	33	23	27	21	25	33	35	21	32	22	26	21	73.4	73.4	62.064	623	323.31	53.9	65	66.9	44	68.5	50.1	59.1	46.1	61634000000	3937800000	16211000000	11316000000	2753100000	5802800000	7526000000	7049500000	7037800000
F8VPD4;P27708;H7C2E4;H7C3Z5;H7BZB3	F8VPD4;P27708	CAD protein;Glutamine-dependent carbamoyl-phosphate synthase;Aspartate carbamoyltransferase;Dihydroorotase	CAD	5	38	38	0	0	38	0	0	0	0	0	0	0	38	0	0	0	0	0	21.9	21.9	236.02	2162	323.31	0	0	21.9	0	0	0	0	0	1230800000	0	0	1230800000	0	0	0	0	0
P04264;CON__P04264	P04264;CON__P04264	Keratin, type II cytoskeletal 1	KRT1	2	55	37	40	47	50	41	45	43	40	35	26	32	34	28	30	27	25	24	60.9	50	66.038	644	323.31	50.2	57.6	56.8	49.1	58.7	39.4	46.1	46.7	156810000000	16084000000	35293000000	28222000000	7802400000	9417400000	23827000000	16852000000	19313000000
P16144;J3KSH9;J3QQL2;J3QRK0	P16144	Integrin beta-4	ITGB4	4	35	35	0	0	0	35	0	0	0	0	0	0	0	35	0	0	0	0	21.5	21.5	202.16	1822	291.59	0	0	0	21.5	0	0	0	0	928510000	0	0	0	928510000	0	0	0	0
Q92616	Q92616	Translational activator GCN1	GCN1L1	1	33	33	0	0	33	0	0	0	0	0	0	0	33	0	0	0	0	0	14	14	292.75	2671	239.64	0	0	14	0	0	0	0	0	411820000	0	0	411820000	0	0	0	0	0
P16615;H7C5W9;O14983;Q93084;A0A0C4DH86;J3QSY6;H3BVB2;H3BTW4	P16615;H7C5W9	Sarcoplasmic/endoplasmic reticulum calcium ATPase 2	ATP2A2	8	31	31	0	30	2	9	0	0	0	0	0	30	2	9	0	0	0	0	36.6	36.6	114.76	1042	323.31	0	35.9	1.8	9.9	0	0	0	0	1485300000	0	1388900000	18896000	77453000	0	0	0	0
Q14974;J3KTM9;J3QR48;J3QKQ5;J3QRG4	Q14974;J3KTM9	Importin subunit beta-1	KPNB1	5	27	27	0	27	1	1	0	0	0	0	0	27	1	1	0	0	0	0	39.5	39.5	97.169	876	323.31	0	39.5	1.4	1.4	0	0	0	0	2601700000	0	2590800000	6139900	4783800	0	0	0	0
P11021	P11021	78 kDa glucose-regulated protein	HSPA5	1	24	23	0	0	0	0	0	0	0	24	0	0	0	0	0	0	0	23	41.7	41.7	72.332	654	191.83	0	0	0	0	0	0	0	41.7	4479800000	0	0	0	0	0	0	0	4479800000
Q8N884	Q8N884	Cyclic GMP-AMP synthase	MB21D1	1	23	23	22	9	5	1	1	0	0	0	22	9	5	1	1	0	0	0	45.2	45.2	58.814	522	294.27	43.9	23.8	14	3.3	1.7	0	0	0	5417300000	4956600000	373280000	82767000	0	4613600	0	0	0
Q13200;H7C1H2;C9JPC0;H7C2Q3;F8WBS8	Q13200	26S proteasome non-ATPase regulatory subunit 2	PSMD2	5	22	22	0	22	0	0	0	0	0	0	0	22	0	0	0	0	0	0	30.8	30.8	100.2	908	267.6	0	30.8	0	0	0	0	0	0	741950000	0	741950000	0	0	0	0	0	0
F5GZS6;J3KPF3;P08195;F5GZI0;H0YFS2;F5H0E2;H0YFX4;F5H867;F5GZR9	F5GZS6;J3KPF3;P08195	4F2 cell-surface antigen heavy chain	SLC3A2	9	20	20	0	20	1	0	0	0	0	8	0	20	1	0	0	0	0	8	41.7	41.7	64.872	599	239.22	0	41.7	2.2	0	0	0	0	18.9	2774000000	0	1768700000	1144900	0	0	0	0	1004100000
A0A0U1RQF0;P49327;A0A0U1RRG3	A0A0U1RQF0;P49327	Fatty acid synthase;[Acyl-carrier-protein] S-acetyltransferase;[Acyl-carrier-protein] S-malonyltransferase;3-oxoacyl-[acyl-carrier-protein] synthase;3-oxoacyl-[acyl-carrier-protein] reductase;3-hydroxyacyl-[acyl-carrier-protein] dehydratase;Enoyl-[acyl-carrier-protein] reductase;Oleoyl-[acyl-carrier-protein] hydrolase	FASN	3	18	18	0	0	18	0	0	0	0	0	0	0	18	0	0	0	0	0	9	9	273.2	2509	149.31	0	0	9	0	0	0	0	0	203550000	0	0	203550000	0	0	0	0	0
P35221;G3XAM7;E5RIB1;E5RG03;E5RHV7;E5RGY7;E5RGY6;E5RJL0;E5RIE0;E5RJ41;E5RFM3;E5RJP7;E5RGD2;E5RJZ2;E5RIT8;E5RFG3;E5RFK9;E5RFM5;Q9UI47	P35221;G3XAM7	Catenin alpha-1	CTNNA1	19	27	18	0	27	0	0	0	0	0	0	0	18	0	0	0	0	0	0	36.5	26.2	100.07	906	323.31	0	36.5	0	0	0	0	0	0	1499200000	0	1499200000	0	0	0	0	0	0
B4DGU4;A0A2R8YCH5;A0A2R8Y5A3;P35222;A0A2R8Y804;A0A2R8Y543;A0A2R8Y5C3;A0A2R8Y750;A0A2R8Y7Z0;A0A2R8Y5Z1;A0A2R8Y6G0;A0A2R8Y815;A0A2R8YG06;E7EMJ5;C9IZ65;E9PDF9;E7EV28	B4DGU4;A0A2R8YCH5;A0A2R8Y5A3;P35222;A0A2R8Y804;A0A2R8Y543;A0A2R8Y5C3;A0A2R8Y750;A0A2R8Y7Z0;A0A2R8Y5Z1;A0A2R8Y6G0	Catenin beta-1	CTNNB1	17	18	16	0	18	0	0	0	0	0	1	0	16	0	0	0	0	0	0	28.7	26.5	84.765	774	264.44	0	28.7	0	0	0	0	0	1.3	1134400000	0	1079300000	0	0	0	0	0	55125000
P05023;M0R116;B1AKY9;A0A2R8YEY8;A0A0A0MT26;P13637;P50993;H0Y7C1;E9PRA5;Q13733;P20648;Q5TC02;Q5TC01;M0QXF2	P05023	Sodium/potassium-transporting ATPase subunit alpha-1	ATP1A1	14	17	16	0	17	0	3	0	0	0	0	0	16	0	3	0	0	0	0	20.9	20.1	112.89	1023	165.92	0	20.9	0	4.2	0	0	0	0	1019400000	0	1007000000	0	12456000	0	0	0	0
C9JIR6;O75688;B8ZZF0;E9PKB5;E9PL75;E9PJN3	C9JIR6;O75688;B8ZZF0	Protein phosphatase 1B	PPM1B	6	18	15	1	0	0	0	17	0	0	0	1	0	0	0	14	0	0	0	57.7	49.5	41.83	378	162.38	2.4	0	0	0	55.3	0	0	0	982850000	11630000	0	0	0	971220000	0	0	0
Q9C0C2;A0A2R8Y5C4;E9PKK0;E9PKE7	Q9C0C2	182 kDa tankyrase-1-binding protein	TNKS1BP1	4	15	15	0	0	15	0	0	0	0	0	0	0	15	0	0	0	0	0	11.1	11.1	181.79	1729	114.84	0	0	11.1	0	0	0	0	0	110790000	0	0	110790000	0	0	0	0	0
P08238;Q58FF7;P07900;Q14568;Q58FF6;G3V2J8;F8W026;Q58FG0;Q58FG1	P08238	Heat shock protein HSP 90-beta	HSP90AB1	9	19	14	2	19	0	0	0	0	0	0	2	14	0	0	0	0	0	0	30.5	23.8	83.263	724	181.68	2.3	30.5	0	0	0	0	0	0	1172700000	10988000	1161800000	0	0	0	0	0	0
P09543;C9K0L8;K7ERZ0;K7ERC4;K7EN66	P09543	2,3-cyclic-nucleotide 3-phosphodiesterase	CNP	5	14	14	0	0	0	0	14	0	0	0	0	0	0	0	14	0	0	0	36.6	36.6	47.578	421	94.821	0	0	0	0	36.6	0	0	0	379580000	0	0	0	0	379580000	0	0	0
P19338;H7BY16;C9JYW2;C9JLB1;C9J1H7;C9JWL1	P19338;H7BY16	Nucleolin	NCL	6	14	14	0	14	0	0	0	0	0	0	0	14	0	0	0	0	0	0	20.3	20.3	76.613	710	107.24	0	20.3	0	0	0	0	0	0	567120000	0	567120000	0	0	0	0	0	0
P35579;A0A0C4DFM8;P35749;P35580	P35579	Myosin-9	MYH9	4	16	14	0	0	16	0	0	0	0	0	0	0	14	0	0	0	0	0	7.3	6.8	226.53	1960	121.99	0	0	7.3	0	0	0	0	0	79956000	0	0	79956000	0	0	0	0	0
Q02413	Q02413	Desmoglein-1	DSG1	1	14	14	6	6	9	7	3	6	5	0	6	6	9	7	3	6	5	0	16.4	16.4	113.75	1049	140.89	6.8	9.1	11.8	9.8	4.6	7.7	5	0	603860000	97356000	97271000	124720000	42614000	22897000	174190000	44810000	0
Q8N1N4;CON__Q8N1N4-2;CON__Q7RTT2;U3KPR1;A0A1B0GTT5;B4DIR1;K7ELP4;K7EJU1;K7EKH9;A0A1X7SCE1;K7EMP8;A0A1X7SBR3;CON__Q61726;A0A087X106;CON__O43790;CON__Q6NT21;CON__P78385;CON__Q14533;A0A1W2PR46;CON__P78386;Q8IWY7;P14136;O43790;P78385;Q14533;P78386	Q8N1N4;CON__Q8N1N4-2;CON__Q7RTT2	Keratin, type II cytoskeletal 78	KRT78	26	16	14	5	5	7	2	0	9	5	1	4	4	7	2	0	7	5	0	31.2	28.3	56.865	520	100.4	9.2	10.4	14.6	3.8	0	17.7	11.2	1.5	238190000	16703000	40244000	55933000	6042500	0	79804000	39467000	0
A0A087WVV2;Q9P2E9;F8W7S5;A0A087WU26;V9GY78	A0A087WVV2;Q9P2E9;F8W7S5	Ribosome-binding protein 1	RRBP1	5	13	13	0	0	2	13	0	0	0	0	0	0	2	13	0	0	0	0	16.7	16.7	102.77	934	87.217	0	0	2	16.7	0	0	0	0	79078000	0	0	5334800	73743000	0	0	0	0
P13639	P13639	Elongation factor 2	EEF2	1	13	13	1	12	0	0	0	0	0	0	1	12	0	0	0	0	0	0	16.7	16.7	95.337	858	105.71	1.3	15.4	0	0	0	0	0	0	340420000	6985900	333440000	0	0	0	0	0	0
P53618;E9PP73;E9PP63;E9PKQ1	P53618;E9PP73	Coatomer subunit beta	COPB1	4	13	13	0	13	0	0	0	0	0	0	0	13	0	0	0	0	0	0	14.4	14.4	107.14	953	85.601	0	14.4	0	0	0	0	0	0	259960000	0	259960000	0	0	0	0	0	0
E9PNM1;A0A1W2PQ47;P37268;E9PJG4;E9PS69	E9PNM1;A0A1W2PQ47;P37268	Squalene synthase	FDFT1	5	11	11	0	0	0	0	11	0	0	0	0	0	0	0	11	0	0	0	30	30	47.285	410	98.653	0	0	0	0	30	0	0	0	344320000	0	0	0	0	344320000	0	0	0
I3L1P8;Q02978	I3L1P8;Q02978	Mitochondrial 2-oxoglutarate/malate carrier protein	SLC25A11	2	11	11	0	0	0	0	0	0	11	0	0	0	0	0	0	0	11	0	37.8	37.8	32.182	296	175.98	0	0	0	0	0	0	37.8	0	445240000	0	0	0	0	0	0	445240000	0
P14923;C9J826;C9JK18;C9JKY1;C9JTX4	P14923	Junction plakoglobin	JUP	5	13	11	7	8	8	5	1	2	2	5	7	6	8	5	1	2	2	4	18.4	16.1	81.744	745	134.36	10.6	10.6	11.9	7.9	1.1	2.8	3.5	7.4	402820000	67016000	68042000	79750000	33825000	6041700	13933000	14727000	119490000
Q14257;H0YL43;A8MXP8	Q14257;H0YL43	Reticulocalbin-2	RCN2	3	11	11	0	0	0	0	11	0	0	0	0	0	0	0	11	0	0	0	37.2	37.2	36.876	317	289.73	0	0	0	0	37.2	0	0	0	628180000	0	0	0	0	628180000	0	0	0
Q8WTS6;D6RJA0;V9GYG1;B5MCZ8	Q8WTS6;D6RJA0	Histone-lysine N-methyltransferase SETD7	SETD7	4	11	11	0	0	11	11	3	0	0	0	0	0	11	11	3	0	0	0	35	35	40.72	366	215.35	0	0	35	35	13.1	0	0	0	17204000000	0	0	11075000000	6103800000	25882000	0	0	0
J3QRD1;P51648;I3L1M4;J3QKK9;J3KTG1;C9JGJ2;I3L0X1;J3QS00;K7EN73;J3KTD9;I3L2W1	J3QRD1;P51648;I3L1M4	Fatty aldehyde dehydrogenase	ALDH3A2	11	10	10	10	0	0	0	0	0	0	0	10	0	0	0	0	0	0	0	25.4	25.4	44.648	393	74.447	25.4	0	0	0	0	0	0	0	280340000	280340000	0	0	0	0	0	0	0
P23396;E9PL09;E9PPU1;F2Z2S8;H0YCJ7;H0YEU2;E9PQ96;E9PJH4;H0YF32;E9PK82;E9PQX2;E9PSF4;H0YES8	P23396;E9PL09;E9PPU1;F2Z2S8;H0YCJ7;H0YEU2;E9PQ96;E9PJH4;H0YF32;E9PK82	40S ribosomal protein S3	RPS3	13	10	10	1	0	0	0	1	1	10	0	1	0	0	0	1	1	10	0	38.7	38.7	26.688	243	68.903	3.7	0	0	0	5.3	4.9	38.7	0	2071000000	4959700	0	0	0	0	0	2066000000	0
P49411;H3BNU3	P49411	Elongation factor Tu, mitochondrial	TUFM	2	10	10	9	0	0	0	1	0	0	0	9	0	0	0	1	0	0	0	27.7	27.7	49.541	452	80.897	25	0	0	0	2.7	0	0	0	208970000	204900000	0	0	0	4068200	0	0	0
Q8WVX9;E9PNW8	Q8WVX9;E9PNW8	Fatty acyl-CoA reductase 1	FAR1	2	10	10	10	0	0	0	0	0	0	0	10	0	0	0	0	0	0	0	18.6	18.6	59.356	515	79.104	18.6	0	0	0	0	0	0	0	204560000	204560000	0	0	0	0	0	0	0
Q92598;A0A0A0MSM0;Q5TBM3;R4GN69;A0A087WTS8;A0A087WYC1;P34932	Q92598;A0A0A0MSM0	Heat shock protein 105 kDa	HSPH1	7	10	10	0	10	0	0	0	0	0	0	0	10	0	0	0	0	0	0	14.2	14.2	96.864	858	111.94	0	14.2	0	0	0	0	0	0	313000000	0	313000000	0	0	0	0	0	0
A0A087WWY3;Q60FE5;P21333;F8WE98;O75369;Q14315	A0A087WWY3;Q60FE5;P21333	Filamin-A	FLNA	6	9	9	0	0	9	0	0	0	0	0	0	0	9	0	0	0	0	0	5.4	5.4	245.85	2315	60.013	0	0	5.4	0	0	0	0	0	29708000	0	0	29708000	0	0	0	0	0
A0A087WXI5;P12830;A0A087WX17;A0A087WU43;H3BNC6;H3BVI7;J3QKP1	A0A087WXI5;P12830;A0A087WX17;A0A087WU43	Cadherin-1;E-Cad/CTF1;E-Cad/CTF2;E-Cad/CTF3	CDH1	7	9	9	0	9	0	0	0	0	0	0	0	9	0	0	0	0	0	0	12.3	12.3	100.03	903	68.4	0	12.3	0	0	0	0	0	0	441140000	0	441140000	0	0	0	0	0	0
A0A0C4DGS1;P39656;U3KQ84	A0A0C4DGS1;P39656	Dolichyl-diphosphooligosaccharide--protein glycosyltransferase 48 kDa subunit	DDOST	3	9	9	0	0	0	0	9	0	0	0	0	0	0	0	9	0	0	0	23.2	23.2	48.799	439	95.323	0	0	0	0	23.2	0	0	0	879750000	0	0	0	0	879750000	0	0	0
B5MC98;Q9HCU5;H7C0W3;F8WCS5	B5MC98;Q9HCU5	Prolactin regulatory element-binding protein	PREB	4	9	9	0	0	0	0	9	0	0	0	0	0	0	0	9	0	0	0	40.1	40.1	38.939	359	162.78	0	0	0	0	40.1	0	0	0	180200000	0	0	0	0	180200000	0	0	0
P02786;G3V0E5;H7C3V5;F8WBE5	P02786;G3V0E5	Transferrin receptor protein 1;Transferrin receptor protein 1, serum form	TFRC	4	9	9	0	9	0	3	0	0	0	0	0	9	0	3	0	0	0	0	13.8	13.8	84.87	760	58.385	0	13.8	0	4.3	0	0	0	0	227810000	0	199170000	0	28644000	0	0	0	0
P04406;E7EUT5;O14556	P04406;E7EUT5	Glyceraldehyde-3-phosphate dehydrogenase	GAPDH	3	9	9	4	2	3	1	1	5	4	0	4	2	3	1	1	5	4	0	33.4	33.4	36.053	335	98.307	14.6	5.1	10.7	3	3	16.1	11.3	0	249180000	69072000	6314000	16776000	668970	2867700	119610000	33876000	0
P50402;Q5HY57	P50402	Emerin	EMD	2	9	9	0	0	0	0	0	0	9	0	0	0	0	0	0	0	9	0	37.8	37.8	28.994	254	71.622	0	0	0	0	0	0	37.8	0	224580000	0	0	0	0	0	0	224580000	0
Q15008;C9J0E9;H7C531;C9J7B7	Q15008	26S proteasome non-ATPase regulatory subunit 6	PSMD6	4	9	9	0	0	0	0	9	0	0	0	0	0	0	0	9	0	0	0	23.1	23.1	45.531	389	64.596	0	0	0	0	23.1	0	0	0	128880000	0	0	0	0	128880000	0	0	0
Q96CS3;D6RBG6	Q96CS3	FAS-associated factor 2	FAF2	2	9	9	9	0	0	0	0	0	0	0	9	0	0	0	0	0	0	0	23.6	23.6	52.623	445	65.021	23.6	0	0	0	0	0	0	0	213760000	213760000	0	0	0	0	0	0	0
Q9UBX3;B4DLN1;F6RGN5;I3L1E8	Q9UBX3;B4DLN1;F6RGN5	Mitochondrial dicarboxylate carrier	SLC25A10	4	9	9	0	0	0	0	0	0	9	0	0	0	0	0	0	0	9	0	35.9	35.9	31.282	287	106.28	0	0	0	0	0	0	35.9	0	427460000	0	0	0	0	0	0	427460000	0
A0A087X2I1;P62333;H0YJC0;H0YJX2;H0YJE9;H0YJT1;H0YJS8	A0A087X2I1;P62333	26S protease regulatory subunit 10B	PSMC6	7	8	8	0	0	0	0	8	0	0	0	0	0	0	0	8	0	0	0	20.3	20.3	45.796	403	74.862	0	0	0	0	20.3	0	0	0	100890000	0	0	0	0	100890000	0	0	0
A0A1W2PQS1;P35998	A0A1W2PQS1;P35998	26S protease regulatory subunit 7	PSMC2	2	8	8	8	0	0	0	0	0	0	0	8	0	0	0	0	0	0	0	22.8	22.8	44.86	400	65.234	22.8	0	0	0	0	0	0	0	100270000	100270000	0	0	0	0	0	0	0
C9JZR2;O60716;E9PKY0	C9JZR2;O60716	Catenin delta-1	CTNND1	3	8	8	0	8	0	0	0	0	0	0	0	8	0	0	0	0	0	0	10.2	10.2	104.85	938	64.447	0	10.2	0	0	0	0	0	0	92655000	0	92655000	0	0	0	0	0	0
O14744;G3V580;G3V5L5;G3V2L6;C9JSX3;G3V2X6;H0YJX6;G3V507;H0YJY6;G3V2F5;H7BZ44	O14744;G3V580;G3V5L5;G3V2L6;C9JSX3	Protein arginine N-methyltransferase 5;Protein arginine N-methyltransferase 5, N-terminally processed	PRMT5	11	8	8	0	0	0	0	0	0	0	8	0	0	0	0	0	0	0	8	12.2	12.2	72.683	637	77.478	0	0	0	0	0	0	0	12.2	770070000	0	0	0	0	0	0	0	770070000
P07355;H0YMD0;H0YMU9;H0YN42;H0YM50;H0YNP5;H0YKS4;H0YNA0;H0YN28;H0YL33;H0YMM1;A6NMY6;H0YKZ7;H0YLV6;H0YMT9;H0YKX9;H0YMW4;H0YN52;H0YKV8;H0YKL9;H0YLE2;H0YMD9	P07355;H0YMD0;H0YMU9;H0YN42;H0YM50;H0YNP5;H0YKS4;H0YNA0;H0YN28;H0YL33;H0YMM1;A6NMY6	Annexin A2;Annexin;Putative annexin A2-like protein	ANXA2;ANXA2P2	22	8	8	1	2	3	1	1	7	1	0	1	2	3	1	1	7	1	0	26.3	26.3	38.604	339	97.222	2.7	5.6	10	2.7	2.9	22.1	2.9	0	232120000	8531100	19839000	22856000	0	5173200	166010000	9703900	0
P11142;E9PKE3;E9PN89;A8K7Q2;E9PNE6;E9PI65;E9PLF4;P54652;E9PQQ4;E9PQK7;E9PK54;E9PPY6;E9PM13;E9PS65	P11142;E9PKE3;E9PN89;A8K7Q2;E9PNE6	Heat shock cognate 71 kDa protein	HSPA8	14	10	8	1	1	0	0	0	0	0	10	0	0	0	0	0	0	0	8	21.7	17.2	70.897	646	81.525	2	2	0	0	0	0	0	21.7	1646300000	8160900	5836200	0	0	0	0	0	1632300000
P53985;Q5T8R5;Q5T8R3	P53985;Q5T8R5	Monocarboxylate transporter 1	SLC16A1	3	8	8	0	0	0	0	8	0	0	0	0	0	0	0	8	0	0	0	17.4	17.4	53.944	500	129.08	0	0	0	0	17.4	0	0	0	229280000	0	0	0	0	229280000	0	0	0
Q13263;M0R0K9;M0R2I3;M0R3C0	Q13263	Transcription intermediary factor 1-beta	TRIM28	4	8	8	0	8	0	0	0	0	0	0	0	8	0	0	0	0	0	0	11.1	11.1	88.549	835	100.25	0	11.1	0	0	0	0	0	0	222900000	0	222900000	0	0	0	0	0	0
Q9UIW2;P51805	Q9UIW2	Plexin-A1	PLXNA1	2	8	8	0	0	8	0	0	0	0	0	0	0	8	0	0	0	0	0	4.8	4.8	211.06	1896	56.603	0	0	4.8	0	0	0	0	0	79443000	0	0	79443000	0	0	0	0	0
A0A087WUZ3;Q01082;F8W6C1	A0A087WUZ3;Q01082	Spectrin beta chain, non-erythrocytic 1	SPTBN1	3	7	7	0	0	7	0	0	0	0	0	0	0	7	0	0	0	0	0	3.1	3.1	274.83	2366	50.08	0	0	3.1	0	0	0	0	0	70232000	0	0	70232000	0	0	0	0	0
D6RAT0;P61247;D6RB09;D6RG13;D6R9B6;E9PFI5;H0Y9Y4;D6RAS7;H0Y8L7;D6RGE0;D6RED7;D6RI02	D6RAT0;P61247;D6RB09;D6RG13;D6R9B6;E9PFI5;H0Y9Y4;D6RAS7;H0Y8L7	40S ribosomal protein S3a	RPS3A	12	7	7	0	0	0	0	0	0	7	0	0	0	0	0	0	0	7	0	34.4	34.4	25.887	227	52.061	0	0	0	0	0	0	34.4	0	163190000	0	0	0	0	0	0	163190000	0
H7BXI1;A0A087WXU3;A0FGR8	H7BXI1;A0A087WXU3;A0FGR8	Extended synaptotagmin-2	ESYT2	3	7	7	0	7	0	0	0	0	0	0	0	7	0	0	0	0	0	0	9.6	9.6	98.008	884	48.412	0	9.6	0	0	0	0	0	0	97463000	0	97463000	0	0	0	0	0	0
P05783;F8VZY9	P05783;F8VZY9	Keratin, type I cytoskeletal 18	KRT18	2	10	7	9	1	0	1	3	1	1	0	7	0	0	0	1	0	0	0	24.7	18.1	48.057	430	66.918	23	1.6	0	1.6	6.5	1.6	1.6	0	219760000	210970000	0	0	0	8788500	0	0	0
P18031;B4DSN5	P18031;B4DSN5	Tyrosine-protein phosphatase non-receptor type 1;Tyrosine-protein phosphatase non-receptor type	PTPN1	2	7	7	7	0	0	0	0	0	0	0	7	0	0	0	0	0	0	0	16.6	16.6	49.966	435	84.72	16.6	0	0	0	0	0	0	0	132010000	132010000	0	0	0	0	0	0	0
P22223;J3QL41	P22223	Cadherin-3	CDH3	2	7	7	0	7	0	0	0	0	0	0	0	7	0	0	0	0	0	0	10.5	10.5	91.417	829	53.614	0	10.5	0	0	0	0	0	0	300110000	0	300110000	0	0	0	0	0	0
P25205;J3KQ69;Q7Z6P5	P25205;J3KQ69	DNA replication licensing factor MCM3	MCM3	3	7	7	0	7	0	0	0	0	0	0	0	7	0	0	0	0	0	0	8.4	8.4	90.98	808	44.547	0	8.4	0	0	0	0	0	0	162390000	0	162390000	0	0	0	0	0	0
P25686;C9JRD2;C9JXB9;C9J1G2;E7ETU0;C9JX00;C9J2C4;A0A0J9YX62;Q8NHS0;O75190	P25686;C9JRD2;C9JXB9;C9J1G2;E7ETU0;C9JX00	DnaJ homolog subfamily B member 2	DNAJB2	10	7	7	0	0	0	0	7	3	0	0	0	0	0	0	7	3	0	0	25.3	25.3	35.58	324	69.084	0	0	0	0	25.3	10.8	0	0	147180000	0	0	0	0	129760000	17416000	0	0
P31944	P31944	Caspase-14;Caspase-14 subunit p17, mature form;Caspase-14 subunit p10, mature form;Caspase-14 subunit p20, intermediate form;Caspase-14 subunit p8, intermediate form	CASP14	1	7	7	0	5	0	1	0	3	0	0	0	5	0	1	0	3	0	0	28.5	28.5	27.679	242	48.815	0	22.3	0	5.8	0	10.3	0	0	92049000	0	35277000	0	0	0	56772000	0	0
P39023;G5E9G0;B5MCW2;H7C422;F8WCR1;H7C3M2;Q92901	P39023;G5E9G0;B5MCW2;H7C422	60S ribosomal protein L3	RPL3	7	7	7	1	0	0	0	7	0	0	0	1	0	0	0	7	0	0	0	16.4	16.4	46.108	403	80.181	1.7	0	0	0	16.4	0	0	0	267750000	8593100	0	0	0	259160000	0	0	0
P62701;C9JEH7;Q8TD47;P22090	P62701	40S ribosomal protein S4, X isoform	RPS4X	4	7	7	0	0	0	0	0	0	7	0	0	0	0	0	0	0	7	0	29.3	29.3	29.597	263	48.896	0	0	0	0	0	0	29.3	0	185850000	0	0	0	0	0	0	185850000	0
Q9UBS4;H7C2Y5	Q9UBS4	DnaJ homolog subfamily B member 11	DNAJB11	2	7	7	0	0	0	0	7	0	0	0	0	0	0	0	7	0	0	0	22.1	22.1	40.513	358	52.147	0	0	0	0	22.1	0	0	0	295740000	0	0	0	0	295740000	0	0	0
Q9Y4R8;H3BRS3;H3BU45	Q9Y4R8;H3BRS3	Telomere length regulation protein TEL2 homolog	TELO2	3	7	7	0	7	0	0	0	0	0	0	0	7	0	0	0	0	0	0	9.2	9.2	91.746	837	54.37	0	9.2	0	0	0	0	0	0	71142000	0	71142000	0	0	0	0	0	0
Q9Y679	Q9Y679	Ancient ubiquitous protein 1	AUP1	1	7	7	0	0	0	0	7	0	0	0	0	0	0	0	7	0	0	0	21.5	21.5	45.786	410	79.036	0	0	0	0	21.5	0	0	0	359690000	0	0	0	0	359690000	0	0	0
C9J6P4;Q7Z2W4	C9J6P4;Q7Z2W4	Zinc finger CCCH-type antiviral protein 1	ZC3HAV1	2	6	6	0	6	0	0	0	0	0	0	0	6	0	0	0	0	0	0	7.3	7.3	114.08	1024	51.253	0	7.3	0	0	0	0	0	0	35212000	0	35212000	0	0	0	0	0	0
E9PCY7;G8JLB6;P31943;D6RIU0;D6RBM0;E7EQJ0;D6RAM1;E5RGV0;D6R9T0;D6RFM3;D6RIT2;E7EN40;D6RDU3;D6RJ04;D6RIH9;H0YB39;P55795;D6RF17;D6RDL0;E5RGH4;H0YBG7;H0YBD7;P52597;D6R9D3;H0YAQ2	E9PCY7;G8JLB6;P31943;D6RIU0;D6RBM0;E7EQJ0;D6RAM1;E5RGV0;D6R9T0;D6RFM3;D6RIT2;E7EN40;D6RDU3;D6RJ04;D6RIH9;H0YB39;P55795	Heterogeneous nuclear ribonucleoprotein H;Heterogeneous nuclear ribonucleoprotein H, N-terminally processed;Heterogeneous nuclear ribonucleoprotein H2	HNRNPH1;HNRNPH2	25	6	6	6	0	0	0	0	0	0	0	6	0	0	0	0	0	0	0	19.1	19.1	47.087	429	48.303	19.1	0	0	0	0	0	0	0	219430000	219430000	0	0	0	0	0	0	0
E9PJH7;Q9H936;A0A0D9SEI9;A0A0D9SFE1;K4DIB8;K4DIA8;E9PS95;Q9H1K4;K4DIB6;K4DIB3;A0A0D9SFA8;K4DIB0;K4DIA2;A0A0D9SG84;E9PI74;E9PQ36	E9PJH7;Q9H936;A0A0D9SEI9;A0A0D9SFE1;K4DIB8;K4DIA8;E9PS95;Q9H1K4;K4DIB6;K4DIB3	Mitochondrial glutamate carrier 1;Mitochondrial glutamate carrier 2	SLC25A22;SLC25A18	16	6	6	0	0	0	0	0	5	5	0	0	0	0	0	0	5	5	0	27.2	27.2	33.281	313	44.91	0	0	0	0	0	24.6	24.6	0	135820000	0	0	0	0	0	69541000	66283000	0
J3KPS0;Q9NXW2;V9GYN7;V9GY70	J3KPS0;Q9NXW2;V9GYN7	DnaJ homolog subfamily B member 12	DNAJB12	4	6	6	0	0	0	0	6	0	0	0	0	0	0	0	6	0	0	0	15.6	15.6	45.489	409	52.543	0	0	0	0	15.6	0	0	0	109090000	0	0	0	0	109090000	0	0	0
O43592;F8WDU6;F5GYW6;F5GZM3	O43592	Exportin-T	XPOT	4	6	6	0	6	0	0	0	0	0	0	0	6	0	0	0	0	0	0	6.4	6.4	109.96	962	37.862	0	6.4	0	0	0	0	0	0	93140000	0	93140000	0	0	0	0	0	0
O43852;H0Y875	O43852;H0Y875	Calumenin	CALU	2	6	6	0	0	0	0	6	0	0	0	0	0	0	0	6	0	0	0	21.6	21.6	37.106	315	51.495	0	0	0	0	21.6	0	0	0	69854000	0	0	0	0	69854000	0	0	0
P05089	P05089	Arginase-1	ARG1	1	6	6	0	2	3	0	0	5	0	0	0	2	3	0	0	5	0	0	18.6	18.6	34.735	322	36.388	0	7.1	9.3	0	0	16.5	0	0	93032000	0	16865000	22362000	0	0	53805000	0	0
P06576;H0YH81;F8W0P7;F8W079;H0YI37	P06576;H0YH81;F8W0P7;F8W079	ATP synthase subunit beta, mitochondrial;ATP synthase subunit beta	ATP5B	5	6	6	6	0	0	0	0	0	0	0	6	0	0	0	0	0	0	0	14.6	14.6	56.559	529	43.273	14.6	0	0	0	0	0	0	0	72405000	72405000	0	0	0	0	0	0	0
P06702	P06702	Protein S100-A9	S100A9	1	6	6	1	5	2	2	4	1	1	0	1	5	2	2	4	1	1	0	51.8	51.8	13.242	114	63.091	11.4	51.8	20.2	24.6	43.9	11.4	11.4	0	774490000	8760900	681360000	22270000	32358000	13053000	4461000	12228000	0
P16070;H0Y2P0;H0YD13;H0YDX6;H0YDW7;H0YCV9;H0Y5E4;H0YE40;E9PKC6;H0YEU1;Q86UZ1;H0YES0;H0YDV8;H0YCL4;J3KN83	P16070;H0Y2P0;H0YD13	CD44 antigen	CD44	15	9	6	0	3	7	4	0	0	0	0	0	2	5	2	0	0	0	0	16.6	10.4	81.537	742	64.629	0	5.3	10	9	0	0	0	0	583070000	0	71474000	411640000	99951000	0	0	0	0
P31151;Q86SG5	P31151;Q86SG5	Protein S100-A7;Protein S100-A7A	S100A7;S100A7A	2	6	6	0	5	1	0	1	2	1	0	0	5	1	0	1	2	1	0	47.5	47.5	11.471	101	242.42	0	47.5	12.9	0	12.9	23.8	12.9	0	175780000	0	155100000	3302300	0	3567300	9005000	4799900	0
Q01650;A0A0C4DGL4;H0YJ95;G3V4Z6;Q9UM01;Q92536	Q01650;A0A0C4DGL4	Large neutral amino acids transporter small subunit 1	SLC7A5	6	6	6	1	2	0	0	2	6	1	0	1	2	0	0	2	6	1	0	14.4	14.4	55.01	507	50.538	1.4	4.9	0	0	6.3	14.4	3.6	0	369940000	9798400	14755000	0	0	18483000	322910000	3997700	0
Q07021;I3L3Q7;I3L3B0	Q07021;I3L3Q7;I3L3B0	Complement component 1 Q subcomponent-binding protein, mitochondrial	C1QBP	3	6	6	0	0	0	0	0	0	6	0	0	0	0	0	0	0	6	0	28	28	31.362	282	48.072	0	0	0	0	0	0	28	0	1015200000	0	0	0	0	0	0	1015200000	0
Q9Y5M8;H7C4H2;C9J5Z8	Q9Y5M8;H7C4H2	Signal recognition particle receptor subunit beta	SRPRB	3	6	6	0	0	0	0	0	0	6	0	0	0	0	0	0	0	6	0	30.6	30.6	29.702	271	42.174	0	0	0	0	0	0	30.6	0	121880000	0	0	0	0	0	0	121880000	0
A0A0A0MRB5;Q8WXG6;C9JM97;C9JLZ9;C9K0L0;A0A0U1RR25	A0A0A0MRB5;Q8WXG6	MAP kinase-activating death domain protein	MADD	6	5	5	0	0	0	5	0	0	0	0	0	0	0	5	0	0	0	0	3.6	3.6	176.55	1588	40.513	0	0	0	3.6	0	0	0	0	35619000	0	0	0	35619000	0	0	0	0
A0A2R8YDQ9;A0A2R8Y6Y7;Q9P2R7;A0A0U1RQF8;A0A2R8Y5P6;A0A2R8Y6E6;A0A0U1RQL1;Q5T9Q5;A0A0U1RQU7;A0A2R8Y5P4	A0A2R8YDQ9;A0A2R8Y6Y7;Q9P2R7;A0A0U1RQF8;A0A2R8Y5P6;A0A2R8Y6E6	Succinyl-CoA ligase [ADP-forming] subunit beta, mitochondrial	SUCLA2	10	5	5	0	0	0	0	5	0	0	0	0	0	0	0	5	0	0	0	12.1	12.1	43.841	405	31.374	0	0	0	0	12.1	0	0	0	87370000	0	0	0	0	87370000	0	0	0
B4DR61;P61619;F8W776;Q8TC24;Q9H9S3;H7C1Q9;C9JXC6;H7C069;A6NK38;F2Z2C7;A6NIF9;C9JJV4	B4DR61;P61619;F8W776;Q8TC24;Q9H9S3	Protein transport protein Sec61 subunit alpha isoform 1;Protein transport protein Sec61 subunit alpha isoform 2	SEC61A1;SEC61A2	12	5	5	0	1	0	0	3	4	1	0	0	1	0	0	3	4	1	0	10	10	52.949	482	29.312	0	1.5	0	0	5.6	7.7	1.9	0	130310000	0	4884200	0	0	27571000	92841000	5009800	0
B5MDF5;P62826;J3KQE5;H0YFC6;F5H018;A0A087X0W0;B4DV51	B5MDF5;P62826;J3KQE5;H0YFC6;F5H018	GTP-binding nuclear protein Ran	RAN	7	5	5	1	0	0	0	1	0	3	0	1	0	0	0	1	0	3	0	21.9	21.9	26.224	233	29.538	3.4	0	0	0	4.7	0	13.7	0	137930000	10761000	0	0	0	0	0	127170000	0
E7EX17;P23588;F8VX11;F8W0K0;F8VRU1;F8VYE9;F8VSC7;F8VP89	E7EX17;P23588	Eukaryotic translation initiation factor 4B	EIF4B	8	5	5	0	0	0	0	0	0	0	5	0	0	0	0	0	0	0	5	10.9	10.9	69.697	616	76.455	0	0	0	0	0	0	0	10.9	88129000	0	0	0	0	0	0	0	88129000
E9PLK3;P55786;H0YCQ5;H0YDG0;E9PP11;A6NEC2	E9PLK3;P55786	Puromycin-sensitive aminopeptidase	NPEPPS	6	5	5	0	5	0	0	0	0	0	0	0	5	0	0	0	0	0	0	6.2	6.2	102.99	915	34.218	0	6.2	0	0	0	0	0	0	46274000	0	46274000	0	0	0	0	0	0
F8VWS0;P05388;F8VQY6;F8VRK7;G3V210;F8VU65;F8VS58;F8VPE8;F8VW21;F8VZS0;Q8NHW5;F8VWV4;F8W1K8	F8VWS0;P05388;F8VQY6;F8VRK7;G3V210;F8VU65;F8VS58;F8VPE8;F8VW21;F8VZS0;Q8NHW5	60S acidic ribosomal protein P0;60S acidic ribosomal protein P0-like	RPLP0;RPLP0P6	13	5	5	0	0	0	0	0	5	0	0	0	0	0	0	0	5	0	0	29.5	29.5	30.456	281	62.963	0	0	0	0	0	29.5	0	0	165690000	0	0	0	0	0	165690000	0	0
M0R2N5;Q9NZ01	M0R2N5;Q9NZ01	Very-long-chain enoyl-CoA reductase	TECR	2	5	5	0	0	0	0	0	0	5	0	0	0	0	0	0	0	5	0	13.6	13.6	39.967	346	33.655	0	0	0	0	0	0	13.6	0	113470000	0	0	0	0	0	0	113470000	0
O75223;M0QZK8;H7BZK5;B8ZZK2	O75223;M0QZK8	Gamma-glutamylcyclotransferase	GGCT	4	5	5	0	2	2	0	0	3	0	0	0	2	2	0	0	3	0	0	28.2	28.2	21.007	188	30.794	0	12.8	10.6	0	0	16.5	0	0	51916000	0	22570000	2985600	0	0	26360000	0	0
O75643;B4E0P5	O75643	U5 small nuclear ribonucleoprotein 200 kDa helicase	SNRNP200	2	5	5	0	0	5	0	0	0	0	0	0	0	5	0	0	0	0	0	2.5	2.5	244.5	2136	30.946	0	0	2.5	0	0	0	0	0	46231000	0	0	46231000	0	0	0	0	0
O95573;F5GWH2;O60488	O95573	Long-chain-fatty-acid--CoA ligase 3	ACSL3	3	5	5	0	0	0	0	0	0	0	5	0	0	0	0	0	0	0	5	7.6	7.6	80.419	720	31.852	0	0	0	0	0	0	0	7.6	335760000	0	0	0	0	0	0	0	335760000
P26641	P26641	Elongation factor 1-gamma	EEF1G	1	5	5	5	0	0	0	0	0	0	0	5	0	0	0	0	0	0	0	13	13	50.118	437	35.517	13	0	0	0	0	0	0	0	58572000	58572000	0	0	0	0	0	0	0
P27348;E9PG15	P27348;E9PG15	14-3-3 protein theta	YWHAQ	2	5	5	0	0	0	0	0	0	5	0	0	0	0	0	0	0	5	0	22.9	22.9	27.764	245	34.505	0	0	0	0	0	0	22.9	0	79918000	0	0	0	0	0	0	79918000	0
P53007;B4DP62	P53007;B4DP62	Tricarboxylate transport protein, mitochondrial	SLC25A1	2	5	5	0	0	0	0	0	0	5	0	0	0	0	0	0	0	5	0	16.4	16.4	34.012	311	41.098	0	0	0	0	0	0	16.4	0	94283000	0	0	0	0	0	0	94283000	0
P55060	P55060	Exportin-2	CSE1L	1	5	5	0	5	0	0	0	0	0	0	0	5	0	0	0	0	0	0	5.8	5.8	110.42	971	36.93	0	5.8	0	0	0	0	0	0	96098000	0	96098000	0	0	0	0	0	0
P62424;Q5T8U3;Q5T8U2	P62424;Q5T8U3	60S ribosomal protein L7a	RPL7A	3	5	5	0	0	0	0	0	0	5	0	0	0	0	0	0	0	5	0	16.9	16.9	29.995	266	35.811	0	0	0	0	0	0	16.9	0	88006000	0	0	0	0	0	0	88006000	0
P68871;F8W6P5;A0A2R8Y7R2;A0A0J9YWK4;E9PEW8;E9PFT6;P02042;C9JRG0;A8MUF7;CON__P02070;A0A2R8Y7X9;CON__Q3SX09;P69892;P69891;P02100	P68871;F8W6P5;A0A2R8Y7R2	Hemoglobin subunit beta;LVV-hemorphin-7;Spinorphin	HBB	15	5	5	0	1	2	1	5	0	1	0	0	1	2	1	5	0	1	0	35.4	35.4	15.998	147	33.477	0	8.8	14.3	8.8	35.4	0	8.8	0	105870000	0	7975000	14833000	5951200	71305000	0	5810400	0
P81605	P81605	Dermcidin;Survival-promoting peptide;DCD-1	DCD	1	5	5	2	3	4	4	3	3	4	2	2	3	4	4	3	3	4	2	42.7	42.7	11.284	110	48.654	22.7	35.5	32.7	35.5	20	20	30	12.7	1439400000	99417000	268540000	308820000	329870000	179150000	45280000	172270000	36083000
Q08554	Q08554	Desmocollin-1	DSC1	1	5	5	2	3	3	1	2	3	1	0	2	3	3	1	2	3	1	0	8.8	8.8	99.986	894	40.902	2.6	4.1	4.1	1.7	4.6	4.4	1.7	0	159180000	10875000	14460000	47028000	15247000	7816600	55830000	7926600	0
Q3LIE7;Q15392;H7C4B7	Q3LIE7;Q15392	Delta(24)-sterol reductase	Nbla03646;DHCR24	3	5	5	5	0	0	0	0	0	0	0	5	0	0	0	0	0	0	0	10.8	10.8	49.436	427	53.999	10.8	0	0	0	0	0	0	0	154580000	154580000	0	0	0	0	0	0	0
Q5JP53;P07437;Q5ST81;A6NNZ2	Q5JP53;P07437;Q5ST81	Tubulin beta chain	TUBB	4	21	5	21	2	0	0	0	0	0	0	5	1	0	0	0	0	0	0	65	17.6	47.766	426	323.31	65	5.2	0	0	0	0	0	0	12342000000	12316000000	25146000	0	0	0	0	0	0
Q8TCT9;A0A075B6F6	Q8TCT9;A0A075B6F6	Minor histocompatibility antigen H13	HM13	2	5	5	0	0	0	0	5	0	0	0	0	0	0	0	5	0	0	0	15.1	15.1	41.488	377	38.754	0	0	0	0	15.1	0	0	0	107370000	0	0	0	0	107370000	0	0	0
Q96C19;H0Y4Y4	Q96C19;H0Y4Y4	EF-hand domain-containing protein D2	EFHD2	2	5	5	0	0	0	0	0	0	5	0	0	0	0	0	0	0	5	0	26.2	26.2	26.697	240	41.251	0	0	0	0	0	0	26.2	0	67080000	0	0	0	0	0	0	67080000	0
Q96HS1;F5GXG4	Q96HS1	Serine/threonine-protein phosphatase PGAM5, mitochondrial	PGAM5	2	5	5	0	0	0	0	0	0	5	0	0	0	0	0	0	0	5	0	15.9	15.9	32.004	289	31.073	0	0	0	0	0	0	15.9	0	40917000	0	0	0	0	0	0	40917000	0
Q9UBM7;E9PRL8;E9PQ71;E9PIP9;E9PJ54;H0YE57;E9PM00	Q9UBM7	7-dehydrocholesterol reductase	DHCR7	7	5	5	0	0	0	0	5	3	0	0	0	0	0	0	5	3	0	0	10.5	10.5	54.489	475	34.897	0	0	0	0	10.5	6.3	0	0	210830000	0	0	0	0	154440000	56397000	0	0
A0A0J9YXZ5;P46940;H0YLE8;A0A087WWP1	A0A0J9YXZ5;P46940;H0YLE8	Ras GTPase-activating-like protein IQGAP1	IQGAP1	4	4	4	0	0	0	4	0	0	0	0	0	0	0	4	0	0	0	0	3.9	3.9	136	1191	32.617	0	0	0	3.9	0	0	0	0	19139000	0	0	0	19139000	0	0	0	0
A0A1W2PNX8;Q9H3U1	A0A1W2PNX8;Q9H3U1	Protein unc-45 homolog A	UNC45A	2	4	4	0	4	0	0	0	0	0	0	0	4	0	0	0	0	0	0	4.1	4.1	118.39	1084	25.253	0	4.1	0	0	0	0	0	0	32503000	0	32503000	0	0	0	0	0	0
A0A286YF22;A0A2C9F2M7;O43175;A0A286YFA2;A0A286YFM8;A0A286YFL2;A0A286YFF3;A0A286YF34;A0A286YFE1;A0A286YER3;A0A286YFC8;A0A286YFK5;A0A286YFB2;A0A286YF78	A0A286YF22;A0A2C9F2M7;O43175;A0A286YFA2;A0A286YFM8;A0A286YFL2	D-3-phosphoglycerate dehydrogenase	PHGDH	14	4	4	4	0	0	0	0	0	0	0	4	0	0	0	0	0	0	0	8	8	55.938	526	26.253	8	0	0	0	0	0	0	0	40514000	40514000	0	0	0	0	0	0	0
D6RH20;G5EA06;Q92552;E5RJ73;D6RJC7	D6RH20;G5EA06;Q92552	28S ribosomal protein S27, mitochondrial	MRPS27	5	4	4	0	0	0	0	4	0	0	0	0	0	0	0	4	0	0	0	13.7	13.7	34.458	299	22.892	0	0	0	0	13.7	0	0	0	20931000	0	0	0	0	20931000	0	0	0
E7EX73;E9PGM1;E7EUU4;Q04637;C9J6B6;C9J2Z7;C9K073;C9JF13;H7C0V6;H7C044	E7EX73;E9PGM1;E7EUU4;Q04637;C9J6B6;C9J2Z7;C9K073;C9JF13	Eukaryotic translation initiation factor 4 gamma 1	EIF4G1	10	4	4	0	0	0	4	0	0	0	0	0	0	0	4	0	0	0	0	4.3	4.3	158.64	1436	28.986	0	0	0	4.3	0	0	0	0	16911000	0	0	0	16911000	0	0	0	0
E9PB90;P52789	E9PB90;P52789	Hexokinase;Hexokinase-2	HK2	2	4	4	0	4	0	0	0	0	0	0	0	4	0	0	0	0	0	0	4.2	4.2	98.972	889	22.591	0	4.2	0	0	0	0	0	0	28530000	0	28530000	0	0	0	0	0	0
E9PF19;Q9Y4P3;Q96E41;A0A087WXC6;F8WDI9	E9PF19;Q9Y4P3;Q96E41	Transducin beta-like protein 2	TBL2	5	4	4	0	0	0	0	4	0	0	0	0	0	0	0	4	0	0	0	10.9	10.9	45.935	411	28.409	0	0	0	0	10.9	0	0	0	35001000	0	0	0	0	35001000	0	0	0
E9PKG1;Q99873;E9PIX6;E9PNR9;E9PQ98;H0YDE4	E9PKG1;Q99873;E9PIX6	Protein arginine N-methyltransferase 1	PRMT1	6	4	4	0	0	0	0	4	0	0	0	0	0	0	0	4	0	0	0	15.4	15.4	37.709	325	27.187	0	0	0	0	15.4	0	0	0	41139000	0	0	0	0	41139000	0	0	0
E9PP36;P62917;E9PKZ0;E9PKU4;G3V1A1	E9PP36;P62917;E9PKZ0;E9PKU4;G3V1A1	60S ribosomal protein L8	RPL8	5	4	4	0	0	0	0	0	0	4	0	0	0	0	0	0	0	4	0	22.3	22.3	16.18	148	26.101	0	0	0	0	0	0	22.3	0	163030000	0	0	0	0	0	0	163030000	0
F5GZQ3;P55084;B5MD38;C9K0M0;C9JEY0;C9JE81	F5GZQ3;P55084;B5MD38;C9K0M0;C9JEY0;C9JE81	Trifunctional enzyme subunit beta, mitochondrial;3-ketoacyl-CoA thiolase	HADHB	6	4	4	4	0	0	0	0	0	0	0	4	0	0	0	0	0	0	0	7.4	7.4	49.597	459	22.081	7.4	0	0	0	0	0	0	0	56745000	56745000	0	0	0	0	0	0	0
F6WQW2;P43487;C9JJ34;C9JDM3;C9JIC6;C9JXG8;C9JGV6	F6WQW2;P43487;C9JJ34;C9JDM3	Ran-specific GTPase-activating protein	RANBP1	7	4	4	0	0	0	0	0	0	4	0	0	0	0	0	0	0	4	0	11.9	11.9	31.904	278	323.31	0	0	0	0	0	0	11.9	0	167430000	0	0	0	0	0	0	167430000	0
F8VVM2;Q00325;F8VZL5;F8VWR4;F8VWQ0	F8VVM2;Q00325	Phosphate carrier protein, mitochondrial	SLC25A3	5	4	4	0	0	0	0	0	1	4	0	0	0	0	0	0	1	4	0	13.9	13.9	36.161	324	34.507	0	0	0	0	0	3.7	13.9	0	559650000	0	0	0	0	0	0	559650000	0
H0YEN5;P15880;I3L404;E9PM36;E9PMM9;E9PQD7;E9PPT0	H0YEN5;P15880;I3L404;E9PM36;E9PMM9;E9PQD7	40S ribosomal protein S2	RPS2	7	4	4	0	0	0	0	0	0	4	0	0	0	0	0	0	0	4	0	18.5	18.5	21.154	195	22.054	0	0	0	0	0	0	18.5	0	67714000	0	0	0	0	0	0	67714000	0
H0YG20;Q9UKM7;H0YGV7;H0YIU0;H0YI64	H0YG20;Q9UKM7;H0YGV7	alpha-1,2-Mannosidase;Endoplasmic reticulum mannosyl-oligosaccharide 1,2-alpha-mannosidase	MAN1B1	5	4	4	0	4	0	0	0	0	0	0	0	4	0	0	0	0	0	0	8.1	8.1	78.973	695	33.656	0	8.1	0	0	0	0	0	0	50055000	0	50055000	0	0	0	0	0	0
H3BT57;P29590;H3BT29;H3BUJ5;H3BVD2	H3BT57;P29590;H3BT29;H3BUJ5	Protein PML	PML	5	4	4	0	4	0	0	0	0	0	0	0	4	0	0	0	0	0	0	6.7	6.7	62.913	568	56.352	0	6.7	0	0	0	0	0	0	12326000	0	12326000	0	0	0	0	0	0
J3KN16;Q5VYK3	J3KN16;Q5VYK3	Proteasome-associated protein ECM29 homolog	KIAA0368;ECM29	2	4	4	0	0	0	4	0	0	0	0	0	0	0	4	0	0	0	0	2.4	2.4	223.69	2017	24.347	0	0	0	2.4	0	0	0	0	22022000	0	0	0	22022000	0	0	0	0
J3KRG2;Q96QA5	J3KRG2;Q96QA5	Gasdermin-A	GSDMA	2	4	4	1	0	2	0	0	1	0	0	1	0	2	0	0	1	0	0	21.5	21.5	17.791	158	23.023	5.1	0	10.8	0	0	5.7	0	0	8803600	5339300	0	3464300	0	0	0	0	0
K7ES11;Q9C0C9	K7ES11;Q9C0C9	E2/E3 hybrid ubiquitin-protein ligase UBE2O	UBE2O	2	4	4	0	0	0	4	0	0	0	0	0	0	0	4	0	0	0	0	4.3	4.3	88.749	807	23.248	0	0	0	4.3	0	0	0	0	10083000	0	0	0	10083000	0	0	0	0
O15269	O15269	Serine palmitoyltransferase 1	SPTLC1	1	4	4	4	0	0	0	0	0	0	0	4	0	0	0	0	0	0	0	8	8	52.743	473	26.179	8	0	0	0	0	0	0	0	116140000	116140000	0	0	0	0	0	0	0
O95292;E5RK64	O95292	Vesicle-associated membrane protein-associated protein B/C	VAPB	2	4	4	0	0	0	0	0	0	4	0	0	0	0	0	0	0	4	0	20.6	20.6	27.228	243	24.842	0	0	0	0	0	0	20.6	0	46683000	0	0	0	0	0	0	46683000	0
O96005;K7EQQ1;K7EJ16	O96005;K7EQQ1	Cleft lip and palate transmembrane protein 1	CLPTM1	3	4	4	0	4	0	0	0	0	0	0	0	4	0	0	0	0	0	0	10	10	76.096	669	31.824	0	10	0	0	0	0	0	0	65491000	0	65491000	0	0	0	0	0	0
P04843;F8WF32;B7Z4L4	P04843;F8WF32;B7Z4L4	Dolichyl-diphosphooligosaccharide--protein glycosyltransferase subunit 1	RPN1	3	4	4	0	0	0	0	0	0	0	4	0	0	0	0	0	0	0	4	8.1	8.1	68.569	607	27.723	0	0	0	0	0	0	0	8.1	175600000	0	0	0	0	0	0	0	175600000
P05141;Q9H0C2	P05141	ADP/ATP translocase 2;ADP/ATP translocase 2, N-terminally processed	SLC25A5	2	10	4	1	0	0	0	2	0	10	0	0	0	0	0	0	0	4	0	32.9	14.4	32.852	298	70.818	3.4	0	0	0	6.7	0	32.9	0	3143600000	9754800	0	0	0	18874000	0	3114900000	0
P10599	P10599	Thioredoxin	TXN	1	4	4	1	2	2	0	1	2	0	0	1	2	2	0	1	2	0	0	31.4	31.4	11.737	105	25.414	8.6	21	10.5	0	8.6	19	0	0	98875000	12512000	29755000	26795000	0	8220500	21592000	0	0
P12004	P12004	Proliferating cell nuclear antigen	PCNA	1	4	4	0	0	0	0	0	0	4	0	0	0	0	0	0	0	4	0	20.3	20.3	28.768	261	32.521	0	0	0	0	0	0	20.3	0	70324000	0	0	0	0	0	0	70324000	0
P13489;H0YCR7;E9PMA9;E9PMN0;E9PIK5;E9PMJ3;E9PLZ3;E9PIM9	P13489;H0YCR7	Ribonuclease inhibitor	RNH1	8	4	4	0	0	0	0	4	0	0	0	0	0	0	0	4	0	0	0	11.3	11.3	49.973	461	31.517	0	0	0	0	11.3	0	0	0	49797000	0	0	0	0	49797000	0	0	0
P29508;C9JZ65;P48594;H0Y5H9	P29508;C9JZ65;P48594	Serpin B3;Serpin B4	SERPINB3;SERPINB4	4	4	4	0	4	0	0	0	0	0	0	0	4	0	0	0	0	0	0	12.8	12.8	44.564	390	40.765	0	12.8	0	0	0	0	0	0	26793000	0	26793000	0	0	0	0	0	0
P36542	P36542	ATP synthase subunit gamma, mitochondrial	ATP5C1	1	4	4	0	0	0	0	0	0	4	0	0	0	0	0	0	0	4	0	13.8	13.8	32.996	298	32.747	0	0	0	0	0	0	13.8	0	74142000	0	0	0	0	0	0	74142000	0
P43358;P43355;P43361;P43363;Q3SYA6;A0A0A0MSA3;P43362;A2A368;A8MXT2;Q96M61;O15480;O60732	P43358;P43355;P43361;P43363	Melanoma-associated antigen 4;Melanoma-associated antigen 1;Melanoma-associated antigen 8;Melanoma-associated antigen 10	MAGEA4;MAGEA1;MAGEA8;MAGEA10	12	4	4	0	0	0	0	4	0	0	0	0	0	0	0	4	0	0	0	13.2	13.2	34.899	317	26.941	0	0	0	0	13.2	0	0	0	61232000	0	0	0	0	61232000	0	0	0
P63261;P60709;A0A2R8Y793;I3L3I0;I3L1U9;I3L4N8;G5E9R0;K7EM38;E7EVS6;I3L3R2;A0A2R8YGF8;J3KT65;C9JUM1;C9JZR7;C9JTX5;A0A2R8YEA7;Q562R1;F8WCH0;A0A2R8YFE2;Q9BYX7	P63261;P60709;A0A2R8Y793;I3L3I0;I3L1U9;I3L4N8	Actin, cytoplasmic 2;Actin, cytoplasmic 2, N-terminally processed;Actin, cytoplasmic 1;Actin, cytoplasmic 1, N-terminally processed	ACTG1;ACTB	20	15	4	1	1	0	2	15	1	1	0	0	0	0	1	4	0	0	0	50.1	21.1	41.792	375	269.57	2.9	2.9	0	5.6	50.1	4.3	2.9	0	5117300000	8114900	3902700	0	0	5095800000	4605300	4929700	0
P68366;C9JEV8;C9JQ00;C9JJQ8;C9JDL2	P68366	Tubulin alpha-4A chain	TUBA4A	5	20	4	20	2	2	1	2	0	0	0	4	0	0	0	0	0	0	0	52.7	12.1	49.924	448	35.233	52.7	5.8	5.1	2	5.1	0	0	0	634810000	634810000	0	0	0	0	0	0	0
Q09028;E9PC52;Q16576;H0YEU5;Q5JP02;H0YCT5;H0YF10;H0YDK2;E9PNS2;Q5JNZ6;E9PIC4;E9PNS6;Q5JP01	Q09028;E9PC52;Q16576;H0YEU5;Q5JP02;H0YCT5;H0YF10;H0YDK2	Histone-binding protein RBBP4;Histone-binding protein RBBP7	RBBP4;RBBP7	13	4	4	4	0	0	0	0	0	0	0	4	0	0	0	0	0	0	0	9.2	9.2	47.655	425	28.08	9.2	0	0	0	0	0	0	0	40650000	40650000	0	0	0	0	0	0	0
Q13085;Q59FY4;O00763	Q13085	Acetyl-CoA carboxylase 1;Biotin carboxylase	ACACA	3	4	4	0	0	4	0	0	0	0	0	0	0	4	0	0	0	0	0	2.4	2.4	265.55	2346	25.451	0	0	2.4	0	0	0	0	0	19494000	0	0	19494000	0	0	0	0	0
Q13637	Q13637	Ras-related protein Rab-32	RAB32	1	4	4	0	0	0	0	0	0	4	0	0	0	0	0	0	0	4	0	22.2	22.2	24.997	225	23.472	0	0	0	0	0	0	22.2	0	22359000	0	0	0	0	0	0	22359000	0
Q14165;F5H1S8;H0YG07;F5GX14	Q14165;F5H1S8;H0YG07	Malectin	MLEC	4	4	4	0	0	0	0	0	0	4	0	0	0	0	0	0	0	4	0	16.8	16.8	32.233	292	30.207	0	0	0	0	0	0	16.8	0	74732000	0	0	0	0	0	0	74732000	0
Q14980;H0YFY6;A0A087WY61;F5H6Y5;F5H4J1	Q14980;H0YFY6;A0A087WY61	Nuclear mitotic apparatus protein 1	NUMA1	5	4	4	0	0	4	0	0	0	0	0	0	0	4	0	0	0	0	0	2.2	2.2	238.26	2115	35.023	0	0	2.2	0	0	0	0	0	15739000	0	0	15739000	0	0	0	0	0
Q15645	Q15645	Pachytene checkpoint protein 2 homolog	TRIP13	1	4	4	4	0	0	0	0	0	0	0	4	0	0	0	0	0	0	0	8.8	8.8	48.55	432	22.57	8.8	0	0	0	0	0	0	0	42289000	42289000	0	0	0	0	0	0	0
Q15758;M0QXM4;M0QX44;M0R144	Q15758;M0QXM4;M0QX44	Neutral amino acid transporter B(0);Amino acid transporter	SLC1A5	4	4	4	0	3	0	0	0	0	0	2	0	3	0	0	0	0	0	2	8.7	8.7	56.598	541	28.788	0	6.3	0	0	0	0	0	4.4	113790000	0	12143000	0	0	0	0	0	101640000
Q3ZCQ8;M0R0C3;M0R2F8;M0QXC3;M0R2Z3;M0R303;M0R2D2;M0R047;M0R1Y4;M0R003	Q3ZCQ8;M0R0C3;M0R2F8	Mitochondrial import inner membrane translocase subunit TIM50	TIMM50	10	4	4	0	0	0	0	0	4	0	0	0	0	0	0	0	4	0	0	13.3	13.3	39.646	353	25.056	0	0	0	0	0	13.3	0	0	37839000	0	0	0	0	0	37839000	0	0
Q6UWP8	Q6UWP8	Suprabasin	SBSN	1	4	4	0	3	2	2	3	2	1	0	0	3	2	2	3	2	1	0	20.7	20.7	60.54	590	50.404	0	18.3	8.5	15.3	18.3	15.3	3.1	0	90422000	0	17247000	13051000	9041400	17044000	28730000	5308000	0
Q6ZRP7;H0Y430	Q6ZRP7;H0Y430	Sulfhydryl oxidase 2;Sulfhydryl oxidase	QSOX2	2	4	4	0	4	0	0	0	0	0	0	0	4	0	0	0	0	0	0	6.2	6.2	77.528	698	28.44	0	6.2	0	0	0	0	0	0	52808000	0	52808000	0	0	0	0	0	0
Q9BQA1;H0Y711	Q9BQA1;H0Y711	Methylosome protein 50	WDR77	2	4	4	0	0	0	0	3	2	0	0	0	0	0	0	3	2	0	0	19.3	19.3	36.724	342	30.991	0	0	0	0	14.9	7.9	0	0	79417000	0	0	0	0	29199000	50218000	0	0
Q9BUF5;K7ESM5;K7EL29;K7ESQ3;K7EQT3;K7EJ64;K7ERA8;K7EJZ4;K7ES63;K7EN98;K7EPE5;K7EK43	Q9BUF5;K7ESM5	Tubulin beta-6 chain	TUBB6	12	14	4	14	0	0	0	0	0	0	0	4	0	0	0	0	0	0	0	35.2	11.4	49.857	446	26.947	35.2	0	0	0	0	0	0	0	66468000	66468000	0	0	0	0	0	0	0
A0A0A0MSI0;Q06830;A0A0A0MRQ5;H7C3T4;Q13162	A0A0A0MSI0;Q06830;A0A0A0MRQ5	Peroxiredoxin-1	PRDX1	5	4	3	1	1	3	1	1	2	1	0	0	0	2	0	0	1	0	0	22.2	15.8	18.976	171	24.934	6.4	6.4	16.4	6.4	6.4	12.3	6.4	0	150320000	24545000	22393000	29554000	9593100	8721600	38366000	17142000	0
A0A0A0MT98;A0A0G2JKZ1;A2AB90;A0A0G2JH37;A0A0A0MSV9;O15533;Q6P1N7;A0A140T9B2;A0A0G2JJI5	A0A0A0MT98;A0A0G2JKZ1;A2AB90;A0A0G2JH37;A0A0A0MSV9;O15533	Tapasin	TAPBP	9	3	3	3	0	0	0	0	0	0	0	3	0	0	0	0	0	0	0	7.8	7.8	38.309	361	17.81	7.8	0	0	0	0	0	0	0	24117000	24117000	0	0	0	0	0	0	0
A0A0C4DGB6;CON__P02768-1;P02768;C9JKR2;H0YA55;B7WNR0;A0A087WWT3;D6RHD5;H7C013	A0A0C4DGB6;CON__P02768-1;P02768;C9JKR2;H0YA55;B7WNR0;A0A087WWT3;D6RHD5	Serum albumin	ALB	9	8	3	3	3	6	5	5	1	4	3	0	0	2	2	2	0	0	0	11.6	5.3	69.226	604	20.17	4	4	8.8	8.6	7.6	2.5	5.1	3.6	28801000	0	0	7395300	8320000	13085000	0	0	0
A0A0G2JIW1;P0DMV9;P0DMV8;V9GZ37;E9PN25	A0A0G2JIW1;P0DMV9;P0DMV8;V9GZ37	Heat shock 70 kDa protein 1B;Heat shock 70 kDa protein 1A	HSPA1B;HSPA1A	5	7	3	1	1	0	0	0	0	0	7	0	0	0	0	0	0	0	3	14.6	6.2	70.108	642	49.498	2	2	0	0	0	0	0	14.6	351100000	0	0	0	0	0	0	0	351100000
A0A1B0GVI7;A0A2R8Y7G1;P35869;E5RGQ2;G3V143;E5RFG4;A9YTQ3	A0A1B0GVI7;A0A2R8Y7G1;P35869	Aryl hydrocarbon receptor	AHR	7	3	3	0	3	0	0	0	0	0	0	0	3	0	0	0	0	0	0	4.3	4.3	90.58	797	17.002	0	4.3	0	0	0	0	0	0	21152000	0	21152000	0	0	0	0	0	0
B4DN67;Q96J84;Q5W0G0;Q5W0F9	B4DN67;Q96J84;Q5W0G0;Q5W0F9	Kin of IRRE-like protein 1	KIRREL	4	3	3	0	3	0	0	0	0	0	0	0	3	0	0	0	0	0	0	6.7	6.7	72.721	657	25.711	0	6.7	0	0	0	0	0	0	31791000	0	31791000	0	0	0	0	0	0
B4DY09;Q12905;X6R6Z1	B4DY09;Q12905	Interleukin enhancer-binding factor 2	ILF2	3	3	3	0	0	0	0	3	0	0	0	0	0	0	0	3	0	0	0	9.7	9.7	38.91	352	21.413	0	0	0	0	9.7	0	0	0	56901000	0	0	0	0	56901000	0	0	0
C9J3L8;C9J5W0;E9PAL7;C9IZQ1;P43307	C9J3L8;C9J5W0;E9PAL7;C9IZQ1;P43307	Translocon-associated protein subunit alpha	SSR1	5	3	3	0	0	0	0	0	3	0	0	0	0	0	0	0	3	0	0	12.8	12.8	29.573	265	18.278	0	0	0	0	0	12.8	0	0	209690000	0	0	0	0	0	209690000	0	0
E5RIU6;A0A087WZZ9;A0A024QZP7;P06493;F8VXD2;A0A2R8YEB7;K7ELV5;F8VYH9;F8VZZ0;F8VTV8;F8VWX7;F8VZ51;K7EJ83;E7ESI2;A0A2R8Y644;H0YAZ9;Q9BVE2;E7EUK8;G3V5T9;E5RGN0;A0A087X209;A0A087WZU2;A0A2R8YD28;F5H6Z0;A0A2R8YF61;A0A2R8Y7W5;J3QSD7;A0A2R8Y4Z0;Q00535;P24941;P11802;Q00526;Q00534;P50750;Q96Q40;O94921;Q07002;Q00536;Q00537;Q9NYV4;Q14004	E5RIU6;A0A087WZZ9;A0A024QZP7;P06493	Cyclin-dependent kinase 1	CDK1;CDC2	41	3	3	0	0	0	0	0	0	3	0	0	0	0	0	0	0	3	0	16.9	16.9	21.738	189	21.612	0	0	0	0	0	0	16.9	0	10540000	0	0	0	0	0	0	10540000	0
H0Y3T6;G3V1E2;Q9BRK5	H0Y3T6;G3V1E2;Q9BRK5	45 kDa calcium-binding protein	SDF4	3	3	3	0	0	0	0	3	0	0	0	0	0	0	0	3	0	0	0	11.9	11.9	28.001	243	19.567	0	0	0	0	11.9	0	0	0	38195000	0	0	0	0	38195000	0	0	0
H0Y6E7;H3BT71;P38159;H3BUY5;Q96E39;Q8IZ40	H0Y6E7;H3BT71;P38159;H3BUY5	RNA-binding motif protein, X chromosome;RNA-binding motif protein, X chromosome, N-terminally processed	RBMX	6	3	3	0	0	0	0	3	0	0	0	0	0	0	0	3	0	0	0	9.6	9.6	31.745	292	21.456	0	0	0	0	9.6	0	0	0	26558000	0	0	0	0	26558000	0	0	0
H0Y9V7;B4E2Q0;P98194;H0Y8X9;H0Y9S7	H0Y9V7;B4E2Q0;P98194;H0Y8X9	Calcium-transporting ATPase;Calcium-transporting ATPase type 2C member 1	ATP2C1	5	3	3	0	3	0	0	0	0	0	0	0	3	0	0	0	0	0	0	4.5	4.5	98.938	903	58.454	0	4.5	0	0	0	0	0	0	41036000	0	41036000	0	0	0	0	0	0
H0YH88;H0YHC3;F8W020;F8W118;F8VXI6;F8VUX1;F8VY35;F8VV59;F8W543;B7Z9C2;F8W0J6;F5H4R6;H0YIV4;P55209;F8VRJ2;F8VVB5;E9PNW0;E9PJJ2;E9PS34;E9PNJ7;A8MXH2;E9PKT8;C9J6D1;C9JZI7;Q99733	H0YH88;H0YHC3;F8W020;F8W118;F8VXI6;F8VUX1;F8VY35;F8VV59;F8W543;B7Z9C2;F8W0J6;F5H4R6;H0YIV4;P55209;F8VRJ2;F8VVB5	Nucleosome assembly protein 1-like 1	NAP1L1	25	3	3	3	0	0	0	0	0	0	0	3	0	0	0	0	0	0	0	18.1	18.1	20.966	177	17.159	18.1	0	0	0	0	0	0	0	15252000	15252000	0	0	0	0	0	0	0
J3KPS3;P04075;H3BUH7;H3BPS8;H3BQN4;H3BR68;H3BMQ8;H3BR04	J3KPS3;P04075;H3BUH7;H3BPS8;H3BQN4	Fructose-bisphosphate aldolase;Fructose-bisphosphate aldolase A	ALDOA	8	3	3	1	0	0	0	3	0	0	0	1	0	0	0	3	0	0	0	10.6	10.6	39.817	368	22.961	3.8	0	0	0	10.6	0	0	0	29721000	5035100	0	0	0	24686000	0	0	0
J3QL56;O75880	J3QL56;O75880	Protein SCO1 homolog, mitochondrial	SCO1	2	3	3	0	0	0	0	0	0	3	0	0	0	0	0	0	0	3	0	5.9	5.9	30.178	270	19.951	0	0	0	0	0	0	5.9	0	19104000	0	0	0	0	0	0	19104000	0
J3QS39;J3QTR3;F5H6Q2;F5GYU3;F5H2Z3;F5H265;B4DV12;F5H388;F5H747;F5GXK7;J3QKN0;Q5PY61;Q96C32;P62987;P62979;P0CG47;P0CG48;M0R1V7;Q49A90;M0R1M6;M0R2S1;A0A2R8Y422;J3QSA3;F5GZ39	J3QS39;J3QTR3;F5H6Q2;F5GYU3;F5H2Z3;F5H265;B4DV12;F5H388;F5H747;F5GXK7;J3QKN0;Q5PY61;Q96C32;P62987;P62979;P0CG47;P0CG48;M0R1V7;Q49A90;M0R1M6;M0R2S1;A0A2R8Y422	Ubiquitin-60S ribosomal protein L40;Ubiquitin;60S ribosomal protein L40;Ubiquitin-40S ribosomal protein S27a;Ubiquitin;40S ribosomal protein S27a;Polyubiquitin-B;Ubiquitin;Polyubiquitin-C;Ubiquitin	UBB;RPS27A;UBC;UBA52	24	3	3	2	3	3	2	2	2	1	1	2	3	3	2	2	2	1	1	36.6	36.6	10.469	93	65.38	19.4	36.6	36.6	26.9	26.9	26.9	17.2	17.2	845450000	124640000	392300000	101700000	49383000	86886000	21405000	22624000	46511000
O14681;E9PLB8;E9PL33;E9PM05;E9PS58;E9PK61;E9PQN7;A0A087WV44;B7ZB74	O14681;E9PLB8;E9PL33;E9PM05;E9PS58;E9PK61	Etoposide-induced protein 2.4 homolog	EI24	9	3	3	0	0	0	0	0	0	3	0	0	0	0	0	0	0	3	0	10.6	10.6	38.964	340	19.95	0	0	0	0	0	0	10.6	0	80119000	0	0	0	0	0	0	80119000	0
O43143	O43143	Pre-mRNA-splicing factor ATP-dependent RNA helicase DHX15	DHX15	1	3	3	0	3	0	0	0	0	0	0	0	3	0	0	0	0	0	0	4	4	90.932	795	28.532	0	4	0	0	0	0	0	0	24227000	0	24227000	0	0	0	0	0	0
P05109	P05109	Protein S100-A8;Protein S100-A8, N-terminally processed	S100A8	1	3	3	0	3	2	3	2	1	1	0	0	3	2	3	2	1	1	0	31.2	31.2	10.834	93	49.785	0	31.2	23.7	31.2	23.7	11.8	11.8	0	552800000	0	404370000	53531000	51987000	27972000	8430700	6509700	0
P09758	P09758	Tumor-associated calcium signal transducer 2	TACSTD2	1	3	3	3	0	0	0	1	0	0	0	3	0	0	0	1	0	0	0	10.8	10.8	35.709	323	19.011	10.8	0	0	0	3.1	0	0	0	49943000	44323000	0	0	0	5620300	0	0	0
P13473;H0YCG2	P13473	Lysosome-associated membrane glycoprotein 2	LAMP2	2	3	3	0	3	0	0	0	0	0	0	0	3	0	0	0	0	0	0	6.6	6.6	44.96	410	33.876	0	6.6	0	0	0	0	0	0	23481000	0	23481000	0	0	0	0	0	0
P25705;K7ERX7;K7EK77;K7ESA0;K7EQH4;K7EJP1;K7ENJ4	P25705;K7ERX7;K7EK77	ATP synthase subunit alpha, mitochondrial	ATP5A1	7	3	3	3	0	0	0	0	0	0	0	3	0	0	0	0	0	0	0	8.5	8.5	59.75	553	19.114	8.5	0	0	0	0	0	0	0	23161000	23161000	0	0	0	0	0	0	0
P27361;E9PBK7;E9PJF0;E9PQW4;H0YEX6;E9PRH7;B3KR49	P27361;E9PBK7;E9PJF0;E9PQW4	Mitogen-activated protein kinase 3;Mitogen-activated protein kinase	MAPK3	7	3	3	0	0	0	0	3	0	0	0	0	0	0	0	3	0	0	0	8.7	8.7	43.135	379	20.872	0	0	0	0	8.7	0	0	0	37258000	0	0	0	0	37258000	0	0	0
P27797;K7EJB9	P27797	Calreticulin	CALR	2	3	3	3	0	0	0	0	0	0	0	3	0	0	0	0	0	0	0	8.9	8.9	48.141	417	19.198	8.9	0	0	0	0	0	0	0	42846000	42846000	0	0	0	0	0	0	0
P30447;P05534;A0A0G2JI36;A0A1W2PQD0;A0A1W2PSE7;A0A0G2JIF2;A0A0G2JL56;P30455;P30443;A0A1W2PP29;A0A1W2PQZ3;A0A1W2PQE2	P30447;P05534	HLA class I histocompatibility antigen, A-23 alpha chain;HLA class I histocompatibility antigen, A-24 alpha chain	HLA-A	12	16	3	0	0	0	0	16	0	0	0	0	0	0	0	3	0	0	0	49	11.2	40.732	365	59.754	0	0	0	0	49	0	0	0	170670000	0	0	0	0	170670000	0	0	0
P30519;I3L276;I3L4P8;A0A1B0GXH0;I3L463;I3L159;I3L1F5;A0A087WT44	P30519;I3L276;I3L4P8;A0A1B0GXH0;I3L463;I3L159;I3L1F5	Heme oxygenase 2	HMOX2	8	3	3	0	0	0	0	0	3	0	0	0	0	0	0	0	3	0	0	8.5	8.5	36.032	316	25.345	0	0	0	0	0	8.5	0	0	24321000	0	0	0	0	0	24321000	0	0
P38646;D6RA73;D6RJI2;H0Y8S0	P38646	Stress-70 protein, mitochondrial	HSPA9	4	3	3	0	0	0	0	0	0	0	3	0	0	0	0	0	0	0	3	5.9	5.9	73.68	679	22.509	0	0	0	0	0	0	0	5.9	113450000	0	0	0	0	0	0	0	113450000
P43686	P43686	26S protease regulatory subunit 6B	PSMC4	1	3	3	3	0	0	0	0	0	0	0	3	0	0	0	0	0	0	0	6.9	6.9	47.366	418	17.198	6.9	0	0	0	0	0	0	0	52118000	52118000	0	0	0	0	0	0	0
P63104;E7ESK7;B0AZS6;E7EX29;E5RGE1;E5RIR4;E9PD24;E7EVZ2;B7Z2E6;H0YB80	P63104;E7ESK7;B0AZS6;E7EX29	14-3-3 protein zeta/delta	YWHAZ	10	3	3	0	0	0	0	0	0	3	0	0	0	0	0	0	0	3	0	18	18	27.745	245	40.572	0	0	0	0	0	0	18	0	43752000	0	0	0	0	0	0	43752000	0
Q00587	Q00587	Cdc42 effector protein 1	CDC42EP1	1	3	3	3	0	0	0	0	0	0	0	3	0	0	0	0	0	0	0	6.1	6.1	40.294	391	17.197	6.1	0	0	0	0	0	0	0	36195000	36195000	0	0	0	0	0	0	0
Q02878;F8VZ45;U3KQR5;F8VR69;F8VZA3;F8VWR1;F8VU16	Q02878;F8VZ45;U3KQR5	60S ribosomal protein L6	RPL6	7	3	3	2	0	0	0	0	1	0	0	2	0	0	0	0	1	0	0	13.2	13.2	32.728	288	17.803	9.7	0	0	0	0	3.5	0	0	34008000	10212000	0	0	0	0	23796000	0	0
Q08188	Q08188	Protein-glutamine gamma-glutamyltransferase E;Protein-glutamine gamma-glutamyltransferase E 50 kDa catalytic chain;Protein-glutamine gamma-glutamyltransferase E 27 kDa non-catalytic chain	TGM3	1	3	3	1	1	2	0	0	2	0	0	1	1	2	0	0	2	0	0	4.6	4.6	76.631	693	22.755	1.9	1.9	3.2	0	0	3.3	0	0	30881000	0	0	21384000	0	0	9496700	0	0
Q13724;C9J8D4	Q13724	Mannosyl-oligosaccharide glucosidase	MOGS	2	3	3	0	3	0	0	0	0	0	0	0	3	0	0	0	0	0	0	4.7	4.7	91.916	837	33.279	0	4.7	0	0	0	0	0	0	38533000	0	38533000	0	0	0	0	0	0
Q14344	Q14344	Guanine nucleotide-binding protein subunit alpha-13	GNA13	1	3	3	0	0	0	0	3	0	0	0	0	0	0	0	3	0	0	0	7.2	7.2	44.049	377	16.208	0	0	0	0	7.2	0	0	0	13325000	0	0	0	0	13325000	0	0	0
Q14849;J3QLM1;J3QRM3	Q14849;J3QLM1	StAR-related lipid transfer protein 3	STARD3	3	3	3	0	0	0	0	3	0	0	0	0	0	0	0	3	0	0	0	5.4	5.4	50.501	445	16.831	0	0	0	0	5.4	0	0	0	22947000	0	0	0	0	22947000	0	0	0
Q15293	Q15293	Reticulocalbin-1	RCN1	1	3	3	0	0	0	0	3	0	0	0	0	0	0	0	3	0	0	0	12.1	12.1	38.89	331	25.077	0	0	0	0	12.1	0	0	0	29892000	0	0	0	0	29892000	0	0	0
Q5QPK2;O60762;Q5QPJ9;H0Y368	Q5QPK2;O60762;Q5QPJ9;H0Y368	Dolichol-phosphate mannosyltransferase subunit 1	DPM1	4	3	3	0	0	0	0	0	0	3	0	0	0	0	0	0	0	3	0	10.1	10.1	32.426	287	21.333	0	0	0	0	0	0	10.1	0	53254000	0	0	0	0	0	0	53254000	0
Q5RI18;A0A1W2PP35;A0A1W2PPS1;Q00839;A0A1W2PQD4;A0A1W2PQL0;A0A1W2PP34;A0A1W2PPL4;A0A1W2PPH7;A0A1X7SBS1;A0A1W2PRI6;A0A1W2PRZ7;A0A1W2PQ74	Q5RI18;A0A1W2PP35;A0A1W2PPS1;Q00839;A0A1W2PQD4;A0A1W2PQL0;A0A1W2PP34;A0A1W2PPL4;A0A1W2PPH7;A0A1X7SBS1	Heterogeneous nuclear ribonucleoprotein U	HNRNPU	13	3	3	2	1	0	0	0	0	0	0	2	1	0	0	0	0	0	0	5.8	5.8	67.824	602	23.616	3.3	2.5	0	0	0	0	0	0	10614000	10614000	0	0	0	0	0	0	0
Q5VTE0;P68104;A0A087WVQ9;A0A087WV01;A6PW80;Q5JR01	Q5VTE0;P68104;A0A087WVQ9;A0A087WV01	Putative elongation factor 1-alpha-like 3;Elongation factor 1-alpha 1;Elongation factor 1-alpha	EEF1A1P5;EEF1A1	6	9	3	9	1	0	1	1	0	0	0	3	0	0	0	0	0	0	0	27.9	13.9	50.184	462	130.14	27.9	2.4	0	2.4	2.4	0	0	0	1973600000	1946900000	12005000	0	3426700	11232000	0	0	0
Q6R327;D6R9S6	Q6R327	Rapamycin-insensitive companion of mTOR	RICTOR	2	3	3	0	0	0	3	0	0	0	0	0	0	0	3	0	0	0	0	1.8	1.8	192.22	1708	19.007	0	0	0	1.8	0	0	0	0	13626000	0	0	0	13626000	0	0	0	0
Q8IXI1;H3BST5;H3BUX4;I3L2C6	Q8IXI1;H3BST5	Mitochondrial Rho GTPase 2	RHOT2	4	3	3	0	0	0	0	0	0	0	3	0	0	0	0	0	0	0	3	5.8	5.8	68.117	618	23.279	0	0	0	0	0	0	0	5.8	117270000	0	0	0	0	0	0	0	117270000
Q8N2K0;I3L440;I3L380;I3L294;Q5T712	Q8N2K0	Monoacylglycerol lipase ABHD12	ABHD12	5	3	3	0	0	0	0	3	0	0	0	0	0	0	0	3	0	0	0	7.8	7.8	45.096	398	18.19	0	0	0	0	7.8	0	0	0	18576000	0	0	0	0	18576000	0	0	0
Q8N4J0;Q5T8U9;Q5T8V1	Q8N4J0;Q5T8U9	UPF0586 protein C9orf41	C9orf41	3	3	3	0	0	0	0	3	0	0	0	0	0	0	0	3	0	0	0	4.9	4.9	47.185	409	18.871	0	0	0	0	4.9	0	0	0	21956000	0	0	0	0	21956000	0	0	0
Q8NF37;A0A0G2JQ62;A0A0G2JRI7	Q8NF37;A0A0G2JQ62	Lysophosphatidylcholine acyltransferase 1	LPCAT1	3	3	3	3	0	0	0	0	0	0	0	3	0	0	0	0	0	0	0	5.6	5.6	59.151	534	19.333	5.6	0	0	0	0	0	0	0	33831000	33831000	0	0	0	0	0	0	0
Q8TBM8;F2Z2L8;H7BZK3;A0A087WWX2	Q8TBM8	DnaJ homolog subfamily B member 14	DNAJB14	4	3	3	0	0	0	0	3	0	0	0	0	0	0	0	3	0	0	0	8.4	8.4	42.515	379	20.171	0	0	0	0	8.4	0	0	0	26613000	0	0	0	0	26613000	0	0	0
Q92973;E7EW37;S4R398	Q92973	Transportin-1	TNPO1	3	3	3	0	3	0	0	0	0	0	0	0	3	0	0	0	0	0	0	4.5	4.5	102.35	898	24.602	0	4.5	0	0	0	0	0	0	28688000	0	28688000	0	0	0	0	0	0
Q96BN8;H0Y8S4	Q96BN8	Ubiquitin thioesterase otulin	OTULIN	2	3	3	0	0	0	0	3	0	0	0	0	0	0	0	3	0	0	0	8.8	8.8	40.262	352	21.585	0	0	0	0	8.8	0	0	0	42734000	0	0	0	0	42734000	0	0	0
Q96P63	Q96P63	Serpin B12	SERPINB12	1	3	3	0	1	1	0	0	2	1	0	0	1	1	0	0	2	1	0	8.9	8.9	46.276	405	17.888	0	2.5	2.5	0	0	6.4	4	0	23594000	0	6315200	4341700	0	0	8291600	4645700	0
Q99523	Q99523	Sortilin	SORT1	1	3	3	0	3	0	0	0	0	0	0	0	3	0	0	0	0	0	0	3.7	3.7	92.067	831	17.234	0	3.7	0	0	0	0	0	0	16239000	0	16239000	0	0	0	0	0	0
Q9BRP1;U3KQA4;K7ESF4	Q9BRP1	Programmed cell death protein 2-like	PDCD2L	3	3	3	0	0	0	0	3	0	0	0	0	0	0	0	3	0	0	0	11.2	11.2	39.416	358	24.448	0	0	0	0	11.2	0	0	0	43380000	0	0	0	0	43380000	0	0	0
Q9BRX2	Q9BRX2	Protein pelota homolog	PELO	1	3	3	0	0	0	0	3	0	0	0	0	0	0	0	3	0	0	0	8.3	8.3	43.359	385	25.452	0	0	0	0	8.3	0	0	0	50762000	0	0	0	0	50762000	0	0	0
Q9BT22;K7EID2;K7EQK1;K7EPU3	Q9BT22;K7EID2	Chitobiosyldiphosphodolichol beta-mannosyltransferase	ALG1	4	3	3	0	0	0	0	3	0	0	0	0	0	0	0	3	0	0	0	7.3	7.3	52.518	464	16.516	0	0	0	0	7.3	0	0	0	14546000	0	0	0	0	14546000	0	0	0
Q9BTV4	Q9BTV4	Transmembrane protein 43	TMEM43	1	3	3	0	0	0	0	3	0	0	0	0	0	0	0	3	0	0	0	8	8	44.875	400	18.559	0	0	0	0	8	0	0	0	17354000	0	0	0	0	17354000	0	0	0
Q9BX59;G3V1T3	Q9BX59	Tapasin-related protein	TAPBPL	2	3	3	3	0	0	0	0	0	0	0	3	0	0	0	0	0	0	0	7.5	7.5	50.182	468	18.9	7.5	0	0	0	0	0	0	0	21243000	21243000	0	0	0	0	0	0	0
Q9NZM1;H0YD14	Q9NZM1;H0YD14	Myoferlin	MYOF	2	3	3	0	0	3	0	0	0	0	0	0	0	3	0	0	0	0	0	1.6	1.6	234.71	2061	16.84	0	0	1.6	0	0	0	0	0	11275000	0	0	11275000	0	0	0	0	0
Q9NZT1	Q9NZT1	Calmodulin-like protein 5	CALML5	1	3	3	0	1	1	1	3	0	0	0	0	1	1	1	3	0	0	0	15.1	15.1	15.892	146	17.898	0	9.6	9.6	9.6	15.1	0	0	0	85877000	0	10565000	26881000	0	48431000	0	0	0
A0A087WW61;A0A087WX67;A0A087WXV3;A0A087WXQ5;K7EJM5;A0A087WV68;K7EN94;B1AKP7;G3V162;A0A087X260;A0A087WYY0;Q13148;A0A087WZC9;A0A087WX29	A0A087WW61;A0A087WX67;A0A087WXV3;A0A087WXQ5;K7EJM5;A0A087WV68;K7EN94;B1AKP7;G3V162;A0A087X260;A0A087WYY0;Q13148;A0A087WZC9;A0A087WX29	TAR DNA-binding protein 43	TARDBP	14	2	2	0	0	0	0	2	0	0	0	0	0	0	0	2	0	0	0	12.3	12.3	15.89	138	11.619	0	0	0	0	12.3	0	0	0	21673000	0	0	0	0	21673000	0	0	0
A0A0A0MR02;P45880;Q5JSD2;Q5JSD1	A0A0A0MR02;P45880;Q5JSD2;Q5JSD1	Voltage-dependent anion-selective channel protein 2	VDAC2	4	2	2	0	0	0	0	0	1	2	0	0	0	0	0	0	1	2	0	8.2	8.2	30.348	282	12.567	0	0	0	0	0	3.5	8.2	0	33856000	0	0	0	0	0	7515400	26341000	0
A0A0A0MS41;A0A1P0AYU5;Q9BWM7;S4R3N9	A0A0A0MS41;A0A1P0AYU5;Q9BWM7;S4R3N9	Sideroflexin;Sideroflexin-3	SFXN3	4	2	2	0	0	0	0	0	2	0	0	0	0	0	0	0	2	0	0	8.7	8.7	35.503	321	13.12	0	0	0	0	0	8.7	0	0	9777000	0	0	0	0	0	9777000	0	0
A0A0C4DGQ8;Q6IAN0;J3QLK1;J3KRS1;J3QKT1	A0A0C4DGQ8;Q6IAN0;J3QLK1;J3KRS1;J3QKT1	Dehydrogenase/reductase SDR family member 7B	DHRS7B	5	2	2	0	0	0	0	0	0	2	0	0	0	0	0	0	0	2	0	9.7	9.7	33.524	310	21.383	0	0	0	0	0	0	9.7	0	10238000	0	0	0	0	0	0	10238000	0
A0A0G2JNZ2;A0A0G2JPP5;Q14160;A0A0G2JMS7;Q5T0G3;Q9BTT6	A0A0G2JNZ2;A0A0G2JPP5;Q14160;A0A0G2JMS7	Protein scribble homolog	SCRIB	6	3	2	0	0	0	3	0	0	0	0	0	0	0	2	0	0	0	0	2	1.4	174.91	1630	20.036	0	0	0	2	0	0	0	0	2294200	0	0	0	2294200	0	0	0	0
A0A0J9YWI0;Q4VXZ8;Q9NUI1;G3V0I9;A0A0J9YXZ6;A0A0J9YY83	A0A0J9YWI0;Q4VXZ8;Q9NUI1;G3V0I9;A0A0J9YXZ6;A0A0J9YY83	Peroxisomal 2,4-dienoyl-CoA reductase	DECR2	6	2	2	0	0	0	0	0	0	2	0	0	0	0	0	0	0	2	0	12.6	12.6	25.141	238	11.629	0	0	0	0	0	0	12.6	0	11646000	0	0	0	0	0	0	11646000	0
A0A0X1KG68;Q5XG87	A0A0X1KG68;Q5XG87	Non-canonical poly(A) RNA polymerase PAPD7	PAPD7	2	2	2	0	2	0	0	0	0	0	0	0	2	0	0	0	0	0	0	3.2	3.2	84.649	792	18.308	0	3.2	0	0	0	0	0	0	11043000	0	11043000	0	0	0	0	0	0
A0A140T9T7;Q03518;A0A0S2Z4R8	A0A140T9T7;Q03518;A0A0S2Z4R8	Antigen peptide transporter 1	TAP1	3	2	2	0	0	0	0	0	0	0	2	0	0	0	0	0	0	0	2	3.5	3.5	87.175	808	15.162	0	0	0	0	0	0	0	3.5	25417000	0	0	0	0	0	0	0	25417000
A0A2R8Y6G6;P06733;A0A2R8Y6I8;A0A2R8Y879;A0A2R8YEM5;K7EM90	A0A2R8Y6G6;P06733;A0A2R8Y6I8;A0A2R8Y879;A0A2R8YEM5;K7EM90	Alpha-enolase;Enolase	ENO1	6	2	2	2	0	0	0	0	0	0	0	2	0	0	0	0	0	0	0	5.3	5.3	47.327	434	11.528	5.3	0	0	0	0	0	0	0	9651100	9651100	0	0	0	0	0	0	0
A0A2R8Y7I0;A0A2R8YDW2;A0A2R8Y4X2;A0A2R8YD40;A0A2R8YDJ9;A0A2R8Y425;A0A2R8Y5J0;A0A2R8YFK9;A0A2U3TZM0;A0A2R8YFD8;F5GWX5;A0A2R8Y212;A0A2R8Y521;A0A0C4DGG9;Q14839;A0A2R8YE38;A0A2R8Y5M9;A0A2R8Y7M9;K7EMY3;A0A2R8YER1;A0A2R8Y8C1;Q8TDI0	A0A2R8Y7I0;A0A2R8YDW2;A0A2R8Y4X2;A0A2R8YD40;A0A2R8YDJ9;A0A2R8Y425;A0A2R8Y5J0;A0A2R8YFK9;A0A2U3TZM0;A0A2R8YFD8;F5GWX5;A0A2R8Y212;A0A2R8Y521;A0A0C4DGG9;Q14839;A0A2R8YE38;A0A2R8Y5M9;A0A2R8Y7M9;K7EMY3;A0A2R8YER1;A0A2R8Y8C1;Q8TDI0	Chromodomain-helicase-DNA-binding protein 4;Chromodomain-helicase-DNA-binding protein 5	CHD4;CHD5	22	2	2	0	0	2	0	0	0	0	0	0	0	2	0	0	0	0	0	4.3	4.3	68.93	605	12.467	0	0	4.3	0	0	0	0	0	14557000	0	0	14557000	0	0	0	0	0
A0A2R8YG21;A0A2R8Y4F5;H0YFD6;P40939;A0A2R8Y688	A0A2R8YG21;A0A2R8Y4F5;H0YFD6;P40939;A0A2R8Y688	Trifunctional enzyme subunit alpha, mitochondrial;Long-chain enoyl-CoA hydratase;Long chain 3-hydroxyacyl-CoA dehydrogenase	HADHA	5	2	2	0	0	0	0	0	0	0	2	0	0	0	0	0	0	0	2	4.2	4.2	54.226	499	24.248	0	0	0	0	0	0	0	4.2	14704000	0	0	0	0	0	0	0	14704000
A2NJV5;A0A0A0MRZ7;A0A075B6S2;A0A087X0Q4;A0A075B6S6;A0A075B6P5;A0A0C4DH68;A0A075B6R9;A0A087WW87;P06310;P01615;P01614	A2NJV5;A0A0A0MRZ7;A0A075B6S2;A0A087X0Q4;A0A075B6S6;A0A075B6P5;A0A0C4DH68;A0A075B6R9;A0A087WW87;P06310;P01615;P01614	Ig kappa chain V-II region RPMI 6410;Ig kappa chain V-II region FR;Ig kappa chain V-II region Cum	IGKV A18;IGKV2D-26;IGKV2D-29;IGKV2-40;IGKV2D-30;IGKV2D-28;IGKV2-24;IGKV2D-24	12	2	2	2	1	1	0	1	0	0	0	2	1	1	0	1	0	0	0	16.7	16.7	13.085	120	32.053	16.7	10.8	10.8	0	10.8	0	0	0	271280000	254600000	12994000	3686500	0	0	0	0	0
A8MUD9;P18124	A8MUD9;P18124	60S ribosomal protein L7	RPL7	2	2	2	0	0	0	0	0	0	2	0	0	0	0	0	0	0	2	0	9.1	9.1	24.433	208	22.85	0	0	0	0	0	0	9.1	0	39493000	0	0	0	0	0	0	39493000	0
C9J0E4;P01040	C9J0E4;P01040	Cystatin-A;Cystatin-A, N-terminally processed	CSTA	2	2	2	0	0	2	0	1	0	0	0	0	0	2	0	1	0	0	0	41.3	41.3	7.0861	63	14.498	0	0	41.3	0	19	0	0	0	33175000	0	0	19987000	0	13188000	0	0	0
C9JP48;P62140;C9J9S3;A0A087WYY5;E7ETD8;E9PMD7;F8VR82;F8VYE8;F8W0W8;P36873;P62136	C9JP48;P62140;C9J9S3;A0A087WYY5;E7ETD8;E9PMD7;F8VR82;F8VYE8;F8W0W8;P36873;P62136	Serine/threonine-protein phosphatase;Serine/threonine-protein phosphatase PP1-beta catalytic subunit;Serine/threonine-protein phosphatase PP1-gamma catalytic subunit;Serine/threonine-protein phosphatase PP1-alpha catalytic subunit	PPP1CB;PPP1CC;PPP1CA	11	2	2	0	0	0	0	0	2	0	0	0	0	0	0	0	2	0	0	16.7	16.7	15.798	138	15.456	0	0	0	0	0	16.7	0	0	11925000	0	0	0	0	0	11925000	0	0
C9JXC1;A0A286YFD6;P31350	C9JXC1;A0A286YFD6;P31350	Ribonucleoside-diphosphate reductase subunit M2	RRM2	3	2	2	0	0	0	0	2	0	0	0	0	0	0	0	2	0	0	0	8.3	8.3	33.789	289	11.914	0	0	0	0	8.3	0	0	0	25953000	0	0	0	0	25953000	0	0	0
C9JZ20;E7ESE2;E9PCW0;C9JW96;P35232;D6RBK0	C9JZ20;E7ESE2;E9PCW0;C9JW96;P35232;D6RBK0	Prohibitin	PHB	6	2	2	0	0	0	0	0	0	2	0	0	0	0	0	0	0	2	0	10.9	10.9	22.27	201	13.584	0	0	0	0	0	0	10.9	0	18949000	0	0	0	0	0	0	18949000	0
D6RAU2;E9PD14;D6RFX4;D6RFZ9;D6RHH4;D6R9Z1;D6R9L0;P63244;D6RGK8;D6R909;D6RBD0;H0YAF8;D6RAC2;J3KPE3;H0Y8W2;D6REE5	D6RAU2;E9PD14;D6RFX4;D6RFZ9;D6RHH4;D6R9Z1;D6R9L0;P63244;D6RGK8;D6R909;D6RBD0;H0YAF8;D6RAC2;J3KPE3;H0Y8W2;D6REE5	Guanine nucleotide-binding protein subunit beta-2-like 1;Guanine nucleotide-binding protein subunit beta-2-like 1, N-terminally processed	GNB2L1	16	2	2	0	0	0	0	0	0	2	0	0	0	0	0	0	0	2	0	14.3	14.3	16.403	147	12.384	0	0	0	0	0	0	14.3	0	21787000	0	0	0	0	0	0	21787000	0
E5RGW4;P06748	E5RGW4;P06748	Nucleophosmin	NPM1	2	2	2	1	0	0	2	0	0	0	0	1	0	0	2	0	0	0	0	37.3	37.3	6.8625	59	12.005	22	0	0	37.3	0	0	0	0	61473000	7867600	0	0	53606000	0	0	0	0
E9PFD2;P11172	E9PFD2;P11172	Uridine 5-monophosphate synthase;Orotate phosphoribosyltransferase;Orotidine 5-phosphate decarboxylase	UMPS	2	2	2	2	0	0	0	0	0	0	0	2	0	0	0	0	0	0	0	5	5	37.64	342	11.66	5	0	0	0	0	0	0	0	5668000	5668000	0	0	0	0	0	0	0
E9PN91;E9PMW7;E9PIZ1;E9PPR1;E9PL12;E9PL71;E9PQ49;E9PI39;H0YCK7;E9PK01;A0A087X1X7;E9PRY8;P29692	E9PN91;E9PMW7;E9PIZ1;E9PPR1;E9PL12;E9PL71;E9PQ49;E9PI39;H0YCK7;E9PK01;A0A087X1X7;E9PRY8;P29692	Elongation factor 1-delta	EEF1D	13	2	2	0	0	0	0	0	2	0	0	0	0	0	0	0	2	0	0	22.6	22.6	11.616	106	20.631	0	0	0	0	0	22.6	0	0	21118000	0	0	0	0	0	21118000	0	0
E9PQ63;A8MTM1;P16152;O75828	E9PQ63;A8MTM1;P16152;O75828	Carbonyl reductase [NADPH] 1;Carbonyl reductase [NADPH] 3	CBR1;CBR3	4	2	2	0	0	0	0	0	0	2	0	0	0	0	0	0	0	2	0	16.9	16.9	19.022	178	20.135	0	0	0	0	0	0	16.9	0	3705500	0	0	0	0	0	0	3705500	0
E9PQY7;E9PS99;E9PL78;E9PJM1;E9PMQ9;E9PSI1;O15321;E9PNW2;E9PJC4;G3V1B9	E9PQY7;E9PS99;E9PL78;E9PJM1;E9PMQ9;E9PSI1;O15321;E9PNW2;E9PJC4;G3V1B9	Transmembrane 9 superfamily member 1	TM9SF1	10	2	2	0	0	0	0	2	0	0	0	0	0	0	0	2	0	0	0	8.7	8.7	28.019	242	13.249	0	0	0	0	8.7	0	0	0	8090900	0	0	0	0	8090900	0	0	0
F8VV32;A0A0B4J259;P61626	F8VV32;A0A0B4J259;P61626	Lysozyme;Lysozyme C	LYZ	3	2	2	0	1	0	1	1	1	0	0	0	1	0	1	1	1	0	0	20.2	20.2	11.488	104	12.884	0	8.7	0	11.5	8.7	11.5	0	0	28115000	0	10469000	0	6794500	6975900	3875300	0	0
F8WF48;Q99442;F8WCJ7	F8WF48;Q99442;F8WCJ7	Translocation protein SEC62	SEC62	3	2	2	2	0	0	0	0	0	0	0	2	0	0	0	0	0	0	0	24.7	24.7	9.8703	85	12.301	24.7	0	0	0	0	0	0	0	22971000	22971000	0	0	0	0	0	0	0
H0Y2V6;Q5SW79;H0Y4T4	H0Y2V6;Q5SW79;H0Y4T4	Centrosomal protein of 170 kDa	CEP170	3	2	2	0	0	0	2	0	0	0	0	0	0	0	2	0	0	0	0	1.5	1.5	171.97	1558	11.14	0	0	0	1.5	0	0	0	0	4342500	0	0	0	4342500	0	0	0	0
H0Y650;Q86Y56;E9PGY2	H0Y650;Q86Y56;E9PGY2	Dynein assembly factor 5, axonemal	DNAAF5	3	2	2	0	2	0	0	0	0	0	0	0	2	0	0	0	0	0	0	3	3	72.472	657	12.428	0	3	0	0	0	0	0	0	10891000	0	10891000	0	0	0	0	0	0
H0YJG7;O95433;H0YJ63;G3V3W9;G3V438	H0YJG7;O95433;H0YJ63;G3V3W9;G3V438	Activator of 90 kDa heat shock protein ATPase homolog 1	AHSA1	5	2	2	0	0	0	0	2	0	0	0	0	0	0	0	2	0	0	0	10.2	10.2	23.697	216	12.168	0	0	0	0	10.2	0	0	0	38076000	0	0	0	0	38076000	0	0	0
H3BM89;P36578;H3BU31	H3BM89;P36578;H3BU31	60S ribosomal protein L4	RPL4	3	2	2	2	0	0	0	0	0	0	0	2	0	0	0	0	0	0	0	6.9	6.9	37.657	333	12.29	6.9	0	0	0	0	0	0	0	27102000	27102000	0	0	0	0	0	0	0
H3BPZ1;H3BS72;Q9P035;H3BMZ1;H3BRL8	H3BPZ1;H3BS72;Q9P035;H3BMZ1;H3BRL8	Very-long-chain (3R)-3-hydroxyacyl-CoA dehydratase 3	HACD3	5	2	2	0	0	0	0	1	1	2	0	0	0	0	0	1	1	2	0	7.4	7.4	40.069	337	13.347	0	0	0	0	4.2	4.2	7.4	0	44462000	0	0	0	0	5404400	15055000	24003000	0
H3BR23;O95273;H3BQA6	H3BR23;O95273;H3BQA6	Cyclin-D1-binding protein 1	CCNDBP1	3	3	2	0	0	0	0	3	0	0	0	0	0	0	0	2	0	0	0	21.8	16.9	16.06	142	21.54	0	0	0	0	21.8	0	0	0	26226000	0	0	0	0	26226000	0	0	0
H3BR82;H3BMF4;Q9H2V7;H3BT44;H3BPQ9	H3BR82;H3BMF4;Q9H2V7;H3BT44;H3BPQ9	Protein spinster homolog 1	SPNS1	5	2	2	0	0	0	0	2	0	0	0	0	0	0	0	2	0	0	0	4.6	4.6	57.19	538	13.409	0	0	0	0	4.6	0	0	0	28707000	0	0	0	0	28707000	0	0	0
H3BVG0;Q8N1F7;H3BV11;H3BRI8;H3BM93;H3BPA9	H3BVG0;Q8N1F7;H3BV11;H3BRI8;H3BM93;H3BPA9	Nuclear pore complex protein Nup93	NUP93	6	2	2	0	2	0	0	0	0	0	0	0	2	0	0	0	0	0	0	3.2	3.2	99.554	880	17.615	0	3.2	0	0	0	0	0	0	17075000	0	17075000	0	0	0	0	0	0
H7C1V0;A0A1B0GW44;A0A1B0GVP3;A0A1B0GV23;A0A1B0GVD5;A0A1B0GWE8;P07339;H7C469	H7C1V0;A0A1B0GW44;A0A1B0GVP3;A0A1B0GV23;A0A1B0GVD5;A0A1B0GWE8;P07339;H7C469	Cathepsin D;Cathepsin D light chain;Cathepsin D heavy chain	CTSD	8	2	2	0	2	1	0	0	0	0	0	0	2	1	0	0	0	0	0	10.1	10.1	20.371	189	12.337	0	10.1	4.2	0	0	0	0	0	27467000	0	21800000	5667000	0	0	0	0	0
J3KNN3;P15735;H3BP07;H3BTW6	J3KNN3;P15735;H3BP07;H3BTW6	Phosphorylase b kinase gamma catalytic chain, liver/testis isoform	PHKG2	4	2	2	0	0	0	0	2	0	0	0	0	0	0	0	2	0	0	0	5.1	5.1	46.886	410	12.555	0	0	0	0	5.1	0	0	0	14595000	0	0	0	0	14595000	0	0	0
J3KQL8;Q9BQE5;E9PM95	J3KQL8;Q9BQE5;E9PM95	Apolipoprotein L2	APOL2	3	2	2	0	0	0	0	0	2	0	0	0	0	0	0	0	2	0	0	4.9	4.9	48.915	449	14.283	0	0	0	0	0	4.9	0	0	20987000	0	0	0	0	0	20987000	0	0
J3QKZ9;J3QLN6;J3KS25;J3QR64;J3KTB5;J3QL43;J3KT12;P60842;J3KSN7;J3QS69;E7EQG2;Q14240	J3QKZ9;J3QLN6;J3KS25;J3QR64;J3KTB5;J3QL43;J3KT12;P60842;J3KSN7;J3QS69;E7EQG2;Q14240	Eukaryotic initiation factor 4A-I;Eukaryotic initiation factor 4A-II;Eukaryotic initiation factor 4A-II, N-terminally processed	EIF4A1;EIF4A2	12	2	2	2	0	0	0	0	0	0	0	2	0	0	0	0	0	0	0	14.2	14.2	14.595	134	11.377	14.2	0	0	0	0	0	0	0	10921000	10921000	0	0	0	0	0	0	0
J3QLE5;P63162;P14678;J3KRY3;S4R3P3	J3QLE5;P63162;P14678;J3KRY3;S4R3P3	Small nuclear ribonucleoprotein-associated protein N;Small nuclear ribonucleoprotein-associated proteins B and B	SNRPN;SNRPB	5	2	2	0	0	0	0	0	0	2	0	0	0	0	0	0	0	2	0	8.9	8.9	17.546	169	11.461	0	0	0	0	0	0	8.9	0	16504000	0	0	0	0	0	0	16504000	0
K7EJC1;K7EJR3;R4GMR5;P48556;K7ERW6	K7EJC1;K7EJR3;R4GMR5;P48556;K7ERW6	26S proteasome non-ATPase regulatory subunit 8	PSMD8	5	2	2	0	0	0	0	0	0	2	0	0	0	0	0	0	0	2	0	10.5	10.5	19.781	172	17.741	0	0	0	0	0	0	10.5	0	11895000	0	0	0	0	0	0	11895000	0
K7EP16;O75821;K7ER90;K7EL20;K7ENA8	K7EP16;O75821;K7ER90;K7EL20;K7ENA8	Eukaryotic translation initiation factor 3 subunit G	EIF3G	5	2	2	0	0	0	0	2	0	0	0	0	0	0	0	2	0	0	0	25.4	25.4	13.212	118	15.379	0	0	0	0	25.4	0	0	0	3281600	0	0	0	0	3281600	0	0	0
O14828	O14828	Secretory carrier-associated membrane protein 3	SCAMP3	1	2	2	0	0	0	0	0	2	0	0	0	0	0	0	0	2	0	0	9.2	9.2	38.287	347	10.923	0	0	0	0	0	9.2	0	0	7322900	0	0	0	0	0	7322900	0	0
O15355	O15355	Protein phosphatase 1G	PPM1G	1	2	2	0	0	0	0	0	0	0	2	0	0	0	0	0	0	0	2	4.2	4.2	59.271	546	12.144	0	0	0	0	0	0	0	4.2	47418000	0	0	0	0	0	0	0	47418000
O75477;B0QZ43	O75477;B0QZ43	Erlin-1	ERLIN1	2	4	2	0	0	0	0	4	0	0	0	0	0	0	0	2	0	0	0	13.6	6.6	38.925	346	26.147	0	0	0	0	13.6	0	0	0	49746000	0	0	0	0	49746000	0	0	0
O94822;H7BYG8	O94822;H7BYG8	E3 ubiquitin-protein ligase listerin	LTN1	2	2	2	0	0	0	2	0	0	0	0	0	0	0	2	0	0	0	0	1.3	1.3	200.55	1766	15.281	0	0	0	1.3	0	0	0	0	7611300	0	0	0	7611300	0	0	0	0
O95159;H0YCU8;E9PMQ3;E9PQA5;E9PQ47;E9PNY1	O95159;H0YCU8;E9PMQ3;E9PQA5;E9PQ47;E9PNY1	Zinc finger protein-like 1	ZFPL1	6	2	2	0	0	0	0	1	1	0	0	0	0	0	0	1	1	0	0	6.1	6.1	34.114	310	11.562	0	0	0	0	3.2	2.9	0	0	32660000	0	0	0	0	6081600	26579000	0	0
O95864	O95864	Fatty acid desaturase 2	FADS2	1	2	2	0	0	0	0	2	0	0	0	0	0	0	0	2	0	0	0	5	5	52.259	444	12.325	0	0	0	0	5	0	0	0	4218400	0	0	0	0	4218400	0	0	0
P01891	P01891	HLA class I histocompatibility antigen, A-68 alpha chain	HLA-A	1	17	2	0	0	0	0	17	0	0	0	0	0	0	0	2	0	0	0	47.4	7.1	40.908	365	323.31	0	0	0	0	47.4	0	0	0	2177600000	0	0	0	0	2177600000	0	0	0
P04792;C9J3N8;F8WE04	P04792;C9J3N8;F8WE04	Heat shock protein beta-1	HSPB1	3	2	2	0	0	0	0	0	0	2	0	0	0	0	0	0	0	2	0	13.2	13.2	22.782	205	12.781	0	0	0	0	0	0	13.2	0	24613000	0	0	0	0	0	0	24613000	0
P07384;E9PLX0;E9PJJ3;E9PLC9;E9PMC6;E9PJA6;E9PSA6;E9PQB3;E9PRM1	P07384;E9PLX0;E9PJJ3;E9PLC9;E9PMC6;E9PJA6;E9PSA6;E9PQB3;E9PRM1	Calpain-1 catalytic subunit	CAPN1	9	2	2	0	0	0	0	0	0	0	2	0	0	0	0	0	0	0	2	3.6	3.6	81.889	714	11.883	0	0	0	0	0	0	0	3.6	0	0	0	0	0	0	0	0	0
P07858;R4GMQ5	P07858;R4GMQ5	Cathepsin B;Cathepsin B light chain;Cathepsin B heavy chain	CTSB	2	2	2	0	0	0	0	0	0	2	0	0	0	0	0	0	0	2	0	8.3	8.3	37.821	339	20.129	0	0	0	0	0	0	8.3	0	13907000	0	0	0	0	0	0	13907000	0
P12273	P12273	Prolactin-inducible protein	PIP	1	2	2	0	1	0	2	1	0	0	0	0	1	0	2	1	0	0	0	15.1	15.1	16.572	146	14.841	0	8.2	0	15.1	8.2	0	0	0	36049000	0	10781000	0	17723000	7545000	0	0	0
P16402;P22492;P16403;Q02539;P10412	P16402;P22492;P16403;Q02539;P10412	Histone H1.3;Histone H1t;Histone H1.2;Histone H1.1;Histone H1.4	HIST1H1D;HIST1H1T;HIST1H1C;HIST1H1A;HIST1H1E	5	2	2	0	0	0	0	0	0	2	0	0	0	0	0	0	0	2	0	12.2	12.2	22.35	221	12.234	0	0	0	0	0	0	12.2	0	11981000	0	0	0	0	0	0	11981000	0
P17066;P48741	P17066;P48741	Heat shock 70 kDa protein 6;Putative heat shock 70 kDa protein 7	HSPA6;HSPA7	2	5	2	1	1	0	0	0	0	0	5	0	0	0	0	0	0	0	2	10.6	3.6	71.027	643	12.056	2	2	0	0	0	0	0	10.6	1036400000	0	0	0	0	0	0	0	1036400000
P19367;Q2TB90	P19367;Q2TB90	Hexokinase-1;Putative hexokinase HKDC1	HK1;HKDC1	2	2	2	0	2	0	0	0	0	0	0	0	2	0	0	0	0	0	0	2.4	2.4	102.48	917	55.714	0	2.4	0	0	0	0	0	0	16726000	0	16726000	0	0	0	0	0	0
P20645;H0YGT2;H0YF90;F5GX30	P20645;H0YGT2;H0YF90;F5GX30	Cation-dependent mannose-6-phosphate receptor	M6PR	4	2	2	0	0	0	0	2	0	0	0	0	0	0	0	2	0	0	0	10.1	10.1	30.993	277	11.326	0	0	0	0	10.1	0	0	0	15536000	0	0	0	0	15536000	0	0	0
P22735;H0YMQ8	P22735;H0YMQ8	Protein-glutamine gamma-glutamyltransferase K	TGM1	2	2	2	0	0	1	0	0	1	0	0	0	0	1	0	0	1	0	0	3.2	3.2	89.786	817	17.563	0	0	1.2	0	0	2	0	0	11100000	0	0	0	0	0	11100000	0	0
P23526	P23526	Adenosylhomocysteinase	AHCY	1	2	2	0	0	0	0	2	0	0	0	0	0	0	0	2	0	0	0	4.6	4.6	47.716	432	12.042	0	0	0	0	4.6	0	0	0	13024000	0	0	0	0	13024000	0	0	0
P35606	P35606	Coatomer subunit beta	COPB2	1	2	2	0	2	0	0	0	0	0	0	0	2	0	0	0	0	0	0	1.9	1.9	102.49	906	11.885	0	1.9	0	0	0	0	0	0	13425000	0	13425000	0	0	0	0	0	0
P35813	P35813	Protein phosphatase 1A	PPM1A	1	5	2	0	0	0	0	5	0	0	0	0	0	0	0	2	0	0	0	13.6	5.5	42.447	382	11.892	0	0	0	0	13.6	0	0	0	16427000	0	0	0	0	16427000	0	0	0
P47929	P47929	Galectin-7	LGALS7	1	2	2	0	0	1	0	1	0	0	0	0	0	1	0	1	0	0	0	19.1	19.1	15.075	136	11.495	0	0	10.3	0	8.8	0	0	0	4065100	0	0	4065100	0	0	0	0	0
P52907	P52907	F-actin-capping protein subunit alpha-1	CAPZA1	1	3	2	0	0	0	0	0	3	0	0	0	0	0	0	0	2	0	0	14.3	10.8	32.922	286	23.183	0	0	0	0	0	14.3	0	0	25035000	0	0	0	0	0	25035000	0	0
P54709;H7C4L9;H7C547;F8WBY4;C9JA36	P54709;H7C4L9;H7C547;F8WBY4;C9JA36	Sodium/potassium-transporting ATPase subunit beta-3	ATP1B3	5	2	2	0	0	0	0	2	0	0	0	0	0	0	0	2	0	0	0	9	9	31.512	279	11.934	0	0	0	0	9	0	0	0	23392000	0	0	0	0	23392000	0	0	0
P62753;A2A3R7;A2A3R5	P62753;A2A3R7;A2A3R5	40S ribosomal protein S6	RPS6	3	2	2	0	0	0	0	0	0	2	0	0	0	0	0	0	0	2	0	8	8	28.68	249	12.663	0	0	0	0	0	0	8	0	62467000	0	0	0	0	0	0	62467000	0
P62873;C9JD14;B1AKQ8;C9JZN1;F6X3N5;F6UT28;F5H8J8;F5H100;C9JIS1;B3KVK2;C9JXA5;F5H0S8;E7EP32;E9PCP0;Q9HAV0;P62879;P16520	P62873;C9JD14;B1AKQ8;C9JZN1;F6X3N5;F6UT28;F5H8J8;F5H100;C9JIS1;B3KVK2;C9JXA5;F5H0S8;E7EP32;E9PCP0;Q9HAV0;P62879;P16520	Guanine nucleotide-binding protein G(I)/G(S)/G(T) subunit beta-1;Guanine nucleotide-binding protein subunit beta-4;Guanine nucleotide-binding protein G(I)/G(S)/G(T) subunit beta-2;Guanine nucleotide-binding protein G(I)/G(S)/G(T) subunit beta-3	GNB1;GNB4;GNB2;GNB3	17	2	2	0	0	0	0	0	2	0	0	0	0	0	0	0	2	0	0	6.5	6.5	37.377	340	11.783	0	0	0	0	0	6.5	0	0	12949000	0	0	0	0	0	12949000	0	0
P63092;Q5JWF2;A0A1W2PRE1;A2A2R6;A0A1W2PQK2;A0A087WTB6;Q5JWD1;H0Y7E8;A0A1W2PRJ7;A0A087WZE5;A0A1W2PS82;A0A0A0MR13;Q5JWE9;H0Y7F4;P11488;P63096;P19087;P09471;P08754;A8MTJ3;P04899;P38405	P63092;Q5JWF2;A0A1W2PRE1;A2A2R6;A0A1W2PQK2;A0A087WTB6;Q5JWD1;H0Y7E8;A0A1W2PRJ7;A0A087WZE5;A0A1W2PS82;A0A0A0MR13;Q5JWE9;H0Y7F4;P11488;P63096;P19087;P09471;P08754;A8MTJ3;P04899;P38405	Guanine nucleotide-binding protein G(s) subunit alpha isoforms short;Guanine nucleotide-binding protein G(s) subunit alpha isoforms XLas;Guanine nucleotide-binding protein G(t) subunit alpha-1;Guanine nucleotide-binding protein G(i) subunit alpha-1;Guanine nucleotide-binding protein G(t) subunit alpha-2;Guanine nucleotide-binding protein G(o) subunit alpha;Guanine nucleotide-binding protein G(k) …	GNAS;GNAO1;GNAT2;GNAT1;GNAI1;GNAI3;GNAT3;GNAI2;GNAL	22	2	2	0	0	0	0	2	1	0	0	0	0	0	0	2	1	0	0	5.1	5.1	45.664	394	11.369	0	0	0	0	5.1	2.8	0	0	18136000	0	0	0	0	11816000	6319900	0	0
Q08378	Q08378	Golgin subfamily A member 3	GOLGA3	1	2	2	0	0	0	2	0	0	0	0	0	0	0	2	0	0	0	0	1.5	1.5	167.35	1498	12.232	0	0	0	1.5	0	0	0	0	5065300	0	0	0	5065300	0	0	0	0
Q13835	Q13835	Plakophilin-1	PKP1	1	2	2	0	2	2	1	1	0	0	0	0	2	2	1	1	0	0	0	3.5	3.5	82.86	747	23.354	0	3.5	3.5	2	2	0	0	0	23828000	0	9933800	5720100	4573500	3600200	0	0	0
Q15208;H0YGN4;F5H277;Q9Y2H1	Q15208;H0YGN4;F5H277;Q9Y2H1	Serine/threonine-protein kinase 38;Serine/threonine-protein kinase 38-like	STK38;STK38L	4	2	2	2	0	0	0	0	0	0	0	2	0	0	0	0	0	0	0	4.7	4.7	54.19	465	12.466	4.7	0	0	0	0	0	0	0	10876000	10876000	0	0	0	0	0	0	0
Q15366;F8VTZ0;F8W0G4;F8VXH9;H3BSS4;F8W1G6;H3BRU6;F8VZX2;J3QT27;E9PFP8;Q15365;P57721	Q15366;F8VTZ0;F8W0G4;F8VXH9;H3BSS4;F8W1G6;H3BRU6;F8VZX2;J3QT27;E9PFP8;Q15365;P57721	Poly(rC)-binding protein 2;Poly(rC)-binding protein 1;Poly(rC)-binding protein 3	PCBP2;PCBP3;PCBP1	12	2	2	0	0	0	0	2	1	0	0	0	0	0	0	2	1	0	0	6.8	6.8	38.58	365	12.801	0	0	0	0	6.8	3	0	0	43364000	0	0	0	0	28051000	15312000	0	0
Q15628	Q15628	Tumor necrosis factor receptor type 1-associated DEATH domain protein	TRADD	1	2	2	0	0	0	0	0	2	0	0	0	0	0	0	0	2	0	0	6.4	6.4	34.247	312	11.411	0	0	0	0	0	6.4	0	0	10905000	0	0	0	0	0	10905000	0	0
Q5SWX8	Q5SWX8	Protein odr-4 homolog	ODR4	1	2	2	2	0	0	0	0	0	0	0	2	0	0	0	0	0	0	0	4.6	4.6	51.103	454	12.69	4.6	0	0	0	0	0	0	0	4805400	4805400	0	0	0	0	0	0	0
Q5T3Q7;Q9H583	Q5T3Q7;Q9H583	HEAT repeat-containing protein 1;HEAT repeat-containing protein 1, N-terminally processed	HEATR1	2	2	2	0	0	2	0	0	0	0	0	0	0	2	0	0	0	0	0	1	1	233.27	2063	13.381	0	0	1	0	0	0	0	0	11153000	0	0	11153000	0	0	0	0	0
Q6DU44;P13747;A0A140T9X6;A0A140T9W7;A0A140T9W3;A0A140T9D9;A0A140T9C2;A0A140T939;Q31611;A0A0G2JNX1;A0A140T9V0;A0A140T8X0;Q8MH48;Q5RJ85;A0A0G2JPQ3;D0EV57;A0A0G2JPA3;A0A140T9B7;A0A0G2JH66;P17693;A0A0D9SFW8;P30511	Q6DU44;P13747	HLA class I histocompatibility antigen, alpha chain E	HLA-E	22	5	2	0	0	0	0	5	0	0	0	0	0	0	0	2	0	0	0	17.3	7.3	40.057	358	12.958	0	0	0	0	17.3	0	0	0	12406000	0	0	0	0	12406000	0	0	0
Q6P3X3	Q6P3X3	Tetratricopeptide repeat protein 27	TTC27	1	2	2	0	2	0	0	0	0	0	0	0	2	0	0	0	0	0	0	2.1	2.1	96.631	843	11.698	0	2.1	0	0	0	0	0	0	11939000	0	11939000	0	0	0	0	0	0
Q6ZVX7	Q6ZVX7	F-box only protein 50	NCCRP1	1	2	2	0	1	1	1	0	1	0	0	0	1	1	1	0	1	0	0	8.4	8.4	30.847	275	23.514	0	4.4	4.4	4	0	4.4	0	0	1879100	0	0	0	1879100	0	0	0	0
Q8N201	Q8N201	Integrator complex subunit 1	INTS1	1	2	2	0	0	2	0	0	0	0	0	0	0	2	0	0	0	0	0	1.3	1.3	244.29	2190	10.869	0	0	1.3	0	0	0	0	0	7622600	0	0	7622600	0	0	0	0	0
Q8N3C0	Q8N3C0	Activating signal cointegrator 1 complex subunit 3	ASCC3	1	2	2	0	0	2	0	0	0	0	0	0	0	2	0	0	0	0	0	1	1	251.46	2202	10.885	0	0	1	0	0	0	0	0	10553000	0	0	10553000	0	0	0	0	0
Q8N8R3;G3V5F4	Q8N8R3;G3V5F4	Mitochondrial basic amino acids transporter	SLC25A29	2	2	2	0	0	0	0	0	0	2	0	0	0	0	0	0	0	2	0	5.6	5.6	32.062	303	10.987	0	0	0	0	0	0	5.6	0	15840000	0	0	0	0	0	0	15840000	0
Q8NC51	Q8NC51	Plasminogen activator inhibitor 1 RNA-binding protein	SERBP1	1	2	2	2	0	0	0	0	0	0	0	2	0	0	0	0	0	0	0	6.6	6.6	44.965	408	20.479	6.6	0	0	0	0	0	0	0	13246000	13246000	0	0	0	0	0	0	0
Q92504;A2AAT0	Q92504;A2AAT0	Zinc transporter SLC39A7	SLC39A7	2	2	2	0	0	0	0	2	0	0	0	0	0	0	0	2	0	0	0	5.3	5.3	50.117	469	16.83	0	0	0	0	5.3	0	0	0	33759000	0	0	0	0	33759000	0	0	0
Q92538	Q92538	Golgi-specific brefeldin A-resistance guanine nucleotide exchange factor 1	GBF1	1	2	2	0	0	1	1	0	0	0	0	0	0	1	1	0	0	0	0	1.3	1.3	206.44	1859	11.56	0	0	0.9	0.4	0	0	0	0	9282700	0	0	2358800	6923800	0	0	0	0
Q92673	Q92673	Sortilin-related receptor	SORL1	1	2	2	0	0	2	0	0	0	0	0	0	0	2	0	0	0	0	0	0.9	0.9	248.42	2214	13.908	0	0	0.9	0	0	0	0	0	2663100	0	0	2663100	0	0	0	0	0
Q92905	Q92905	COP9 signalosome complex subunit 5	COPS5	1	2	2	0	0	0	0	0	1	0	1	0	0	0	0	0	1	0	1	5.4	5.4	37.578	334	13.37	0	0	0	0	0	3	0	2.4	159370000	0	0	0	0	0	3875000	0	155490000
Q93008	Q93008	Probable ubiquitin carboxyl-terminal hydrolase FAF-X	USP9X	1	3	2	0	0	3	0	0	0	0	0	0	0	2	0	0	0	0	0	1.3	0.9	292.28	2570	17.926	0	0	1.3	0	0	0	0	0	19698000	0	0	19698000	0	0	0	0	0
Q96BT7	Q96BT7	Alkylated DNA repair protein alkB homolog 8	ALKBH8	1	2	2	2	0	0	0	0	0	0	0	2	0	0	0	0	0	0	0	4.7	4.7	75.208	664	11.679	4.7	0	0	0	0	0	0	0	61342000	61342000	0	0	0	0	0	0	0
Q96GW1;A0A1W2PRR1;P14625;F8VPC7	Q96GW1;A0A1W2PRR1;P14625	Endoplasmin	HSP90B1	4	3	2	0	3	0	0	0	0	0	0	0	2	0	0	0	0	0	0	11.4	7.6	35.449	315	12.13	0	11.4	0	0	0	0	0	0	25538000	0	25538000	0	0	0	0	0	0
Q96JJ7;B4DIE3	Q96JJ7;B4DIE3	Protein disulfide-isomerase TMX3	TMX3	2	2	2	2	0	0	0	0	0	0	0	2	0	0	0	0	0	0	0	5.7	5.7	51.871	454	15.458	5.7	0	0	0	0	0	0	0	16368000	16368000	0	0	0	0	0	0	0
Q9BZG1;V9GY61;K7EJW7;K7EIF2;H7C0Y7;C9JBG0;Q96PJ7;C9JY26;E7ES60	Q9BZG1;V9GY61;K7EJW7;K7EIF2;H7C0Y7;C9JBG0;Q96PJ7;C9JY26;E7ES60	Ras-related protein Rab-34	RAB34	9	2	2	0	0	0	0	0	0	2	0	0	0	0	0	0	0	2	0	9.3	9.3	29.044	259	14.071	0	0	0	0	0	0	9.3	0	30467000	0	0	0	0	0	0	30467000	0
Q9HC07;V9GYC8;D6RBL0;D6RD79;V9GY93	Q9HC07;V9GYC8;D6RBL0;D6RD79;V9GY93	Transmembrane protein 165	TMEM165	5	2	2	0	0	0	0	1	2	1	0	0	0	0	0	1	2	1	0	11.1	11.1	34.905	324	41.769	0	0	0	0	7.7	11.1	7.7	0	30464000	0	0	0	0	10384000	9554100	10526000	0
Q9NX57	Q9NX57	Ras-related protein Rab-20	RAB20	1	2	2	0	0	0	0	0	0	2	0	0	0	0	0	0	0	2	0	8.1	8.1	26.277	234	11.636	0	0	0	0	0	0	8.1	0	9446900	0	0	0	0	0	0	9446900	0
Q9UHW5;S4R3M7;H0YI19;F8W1F4	Q9UHW5;S4R3M7;H0YI19;F8W1F4	GPN-loop GTPase 3	GPN3	4	2	2	0	0	0	0	0	0	2	0	0	0	0	0	0	0	2	0	9.9	9.9	32.761	284	21.994	0	0	0	0	0	0	9.9	0	24925000	0	0	0	0	0	0	24925000	0
Q9UJS0;R4GN64	Q9UJS0;R4GN64	Calcium-binding mitochondrial carrier protein Aralar2	SLC25A13	2	3	2	0	0	0	0	0	0	0	3	0	0	0	0	0	0	0	2	5.6	3.9	74.175	675	20.641	0	0	0	0	0	0	0	5.6	54818000	0	0	0	0	0	0	0	54818000
Q9UN37;I3L4J1	Q9UN37;I3L4J1	Vacuolar protein sorting-associated protein 4A	VPS4A	2	2	2	2	0	0	0	0	0	0	0	2	0	0	0	0	0	0	0	5.3	5.3	48.897	437	11.351	5.3	0	0	0	0	0	0	0	15723000	15723000	0	0	0	0	0	0	0
Q9Y2U8	Q9Y2U8	Inner nuclear membrane protein Man1	LEMD3	1	2	2	0	2	1	0	0	0	0	0	0	2	1	0	0	0	0	0	2.2	2.2	99.996	911	10.772	0	2.2	1	0	0	0	0	0	10130000	0	7991100	2138900	0	0	0	0	0
Q9Y3B9	Q9Y3B9	RRP15-like protein	RRP15	1	2	2	0	0	0	0	2	0	0	0	0	0	0	0	2	0	0	0	8.5	8.5	31.484	282	15.703	0	0	0	0	8.5	0	0	0	1275400	0	0	0	0	1275400	0	0	0
Q9Y446	Q9Y446	Plakophilin-3	PKP3	1	2	2	0	2	0	0	0	0	0	0	0	2	0	0	0	0	0	0	2	2	87.081	797	11.199	0	2	0	0	0	0	0	0	20087000	0	20087000	0	0	0	0	0	0
S4R3Q9;J3KNA0;Q15070;C9JC63;E7EVY0	S4R3Q9;J3KNA0;Q15070;C9JC63;E7EVY0	Mitochondrial inner membrane protein OXA1L	OXA1L	5	2	2	0	0	0	0	2	0	0	0	0	0	0	0	2	0	0	0	4.6	4.6	48.519	435	12.953	0	0	0	0	4.6	0	0	0	23834000	0	0	0	0	23834000	0	0	0
U3KQK0;Q99880;Q99879;Q99877;Q93079;Q8N257;Q5QNW6;Q16778;P62807;P58876;P57053;P33778;P23527;P06899;O60814;Q96A08;A0A2R8Y619	U3KQK0;Q99880;Q99879;Q99877;Q93079;Q8N257;Q5QNW6;Q16778;P62807;P58876;P57053;P33778;P23527;P06899;O60814;Q96A08;A0A2R8Y619	Histone H2B;Histone H2B type 1-L;Histone H2B type 1-M;Histone H2B type 1-N;Histone H2B type 1-H;Histone H2B type 3-B;Histone H2B type 2-F;Histone H2B type 2-E;Histone H2B type 1-C/E/F/G/I;Histone H2B type 1-D;Histone H2B type F-S;Histone H2B type 1-B;Histone H2B type 1-O;Histone H2B type 1-J;Histone H2B type 1-K;Histone H2B type 1-A	HIST1H2BN;HIST1H2BL;HIST1H2BM;HIST1H2BH;HIST3H2BB;HIST2H2BF;HIST2H2BE;HIST1H2BC;HIST1H2BD;H2BFS;HIST1H2BB;HIST1H2BO;HIST1H2BJ;HIST1H2BK;HIST1H2BA	17	2	2	2	0	0	0	1	0	0	0	2	0	0	0	1	0	0	0	12	12	18.804	166	11.606	12	0	0	0	5.4	0	0	0	11611000	11611000	0	0	0	0	0	0	0
A0A087WX35;Q8N5Z5	A0A087WX35;Q8N5Z5	BTB/POZ domain-containing protein KCTD17	KCTD17	2	1	1	0	0	0	0	0	0	1	0	0	0	0	0	0	0	1	0	5.5	5.5	24.772	220	7.2815	0	0	0	0	0	0	5.5	0	5376000	0	0	0	0	0	0	5376000	0
A0A087WX60;Q86TC9	A0A087WX60;Q86TC9	Myopalladin	MYPN	2	1	1	0	0	0	0	0	0	0	1	0	0	0	0	0	0	0	1	0.8	0.8	112.72	1026	-2	0	0	0	0	0	0	0	0.8	14598000	0	0	0	0	0	0	0	14598000
A0A087WXY2;Q99959	A0A087WXY2;Q99959	Plakophilin-2	PKP2	2	1	1	0	1	0	0	0	0	0	0	0	1	0	0	0	0	0	0	30.6	30.6	3.7202	36	6.7342	0	30.6	0	0	0	0	0	0	6915800	0	6915800	0	0	0	0	0	0
A0A087X0U3;A0A087WT87;P43003	A0A087X0U3;A0A087WT87;P43003	Amino acid transporter;Excitatory amino acid transporter 1	SLC1A3	3	1	1	1	0	0	0	0	0	0	0	1	0	0	0	0	0	0	0	2.8	2.8	47.099	430	17.676	2.8	0	0	0	0	0	0	0	0	0	0	0	0	0	0	0	0
A0A0B4J269;Q13509;G3V2A3;G3V5W4;G3V2R8;G3V3R4;G3V2N6	A0A0B4J269;Q13509	Tubulin beta-3 chain	TUBB3	7	14	1	14	1	0	0	0	0	0	0	1	0	0	0	0	0	0	0	19.6	1.5	88.381	797	34.172	19.6	1.3	0	0	0	0	0	0	293970000	293970000	0	0	0	0	0	0	0
A0A0D9SF91;A0A0D9SGI3;A0A0D9SG77;A0A1B0GVL3;Q05086	A0A0D9SF91;A0A0D9SGI3;A0A0D9SG77;A0A1B0GVL3;Q05086	Ubiquitin-protein ligase E3A	UBE3A	5	1	1	0	1	0	0	0	0	0	0	0	1	0	0	0	0	0	0	7	7	21.092	187	10.895	0	7	0	0	0	0	0	0	6925100	0	6925100	0	0	0	0	0	0
A0A140T9Y7;Q08J23	A0A140T9Y7;Q08J23	tRNA (cytosine(34)-C(5))-methyltransferase	NSUN2	2	1	1	0	1	0	0	0	0	0	0	0	1	0	0	0	0	0	0	9.4	9.4	23.383	202	7.1909	0	9.4	0	0	0	0	0	0	4795600	0	4795600	0	0	0	0	0	0
A0A1B0GXB4;H3BV36;H3BMS6;H3BNX3;Q9Y6N5	A0A1B0GXB4;H3BV36;H3BMS6;H3BNX3;Q9Y6N5	Sulfide:quinone oxidoreductase, mitochondrial	SQRDL	5	1	1	0	0	0	0	1	0	0	0	0	0	0	0	1	0	0	0	10	10	15.074	140	6.3736	0	0	0	0	10	0	0	0	3139800	0	0	0	0	3139800	0	0	0
A0A1X7SBW3;Q5TA31	A0A1X7SBW3;Q5TA31	E3 ubiquitin-protein ligase RNF187		2	1	1	0	0	0	0	0	0	1	0	0	0	0	0	0	0	1	0	5.5	5.5	26.172	235	9.3493	0	0	0	0	0	0	5.5	0	3832900	0	0	0	0	0	0	3832900	0
A0A286YFF8;Q7Z3U7	A0A286YFF8;Q7Z3U7	Protein MON2 homolog	MON2	2	1	1	0	0	0	1	0	0	0	0	0	0	0	1	0	0	0	0	0.6	0.6	190.48	1718	6.3152	0	0	0	0.6	0	0	0	0	7348000	0	0	0	7348000	0	0	0	0
A0A2R8Y5P9;Q8TF72	A0A2R8Y5P9;Q8TF72	Protein Shroom3	SHROOM3	2	1	1	1	1	1	1	1	1	1	1	1	1	1	1	1	1	1	1	0.5	0.5	208.05	1915	6.8305	0.5	0.5	0.5	0.5	0.5	0.5	0.5	0.5	9178200000	1468600000	1656400000	1879100000	943280000	2142800000	220810000	210050000	657080000
A0A2R8Y7C0;P69905	A0A2R8Y7C0;P69905	Hemoglobin subunit alpha	HBA1	2	3	1	0	0	0	0	3	0	0	0	0	0	0	0	1	0	0	0	29.9	11.2	13.842	134	9.2231	0	0	0	0	29.9	0	0	0	8181400	0	0	0	0	8181400	0	0	0
A0PK00	A0PK00	Transmembrane protein 120B	TMEM120B	1	1	1	0	1	0	0	0	0	0	0	0	1	0	0	0	0	0	0	2.1	2.1	40.245	339	-2	0	2.1	0	0	0	0	0	0	13296000	0	13296000	0	0	0	0	0	0
A6NHL2	A6NHL2	Tubulin alpha chain-like 3	TUBAL3	1	5	1	5	0	1	1	1	0	0	0	1	0	0	0	0	0	0	0	10.3	3.8	49.908	446	9.157	10.3	0	2	2	2	0	0	0	78581000	78581000	0	0	0	0	0	0	0
A6NMS2;B1ALA7;D3YTJ7;B1ALA9;A0A0B4J207;A0A2R8Y7H4;P60891;P21108;P11908	A6NMS2;B1ALA7;D3YTJ7;B1ALA9;A0A0B4J207;A0A2R8Y7H4;P60891;P21108;P11908	Ribose-phosphate pyrophosphokinase 1;Ribose-phosphate pyrophosphokinase 3;Ribose-phosphate pyrophosphokinase 2	PRPS2;PRPS1;PRPS1L1	9	1	1	0	0	0	0	0	1	0	0	0	0	0	0	0	1	0	0	8.2	8.2	16.13	147	6.3615	0	0	0	0	0	8.2	0	0	8419700	0	0	0	0	0	8419700	0	0
B0YJC4;P08670;B0YJC5	B0YJC4;P08670;B0YJC5	Vimentin	VIM	3	2	1	1	0	0	0	0	1	0	0	1	0	0	0	0	0	0	0	4.2	2.6	49.653	431	9.1756	2.6	0	0	0	0	1.6	0	0	0	0	0	0	0	0	0	0	0
B1AN99;P35030	B1AN99;P35030	Trypsin-3	PRSS3	2	1	1	1	1	1	1	1	0	1	0	1	1	1	1	1	0	1	0	7.3	7.3	19.288	177	9.9244	7.3	7.3	7.3	7.3	7.3	0	7.3	0	379030000	27209000	47496000	80559000	56791000	137320000	0	29657000	0
C9J384;Q9BQ75	C9J384;Q9BQ75	Protein CMSS1	CMSS1	2	1	1	0	0	0	0	0	0	1	0	0	0	0	0	0	0	1	0	4.9	4.9	26.228	225	6.5374	0	0	0	0	0	0	4.9	0	1774600	0	0	0	0	0	0	1774600	0
C9JKY3;B5MCA4;P16422	C9JKY3;B5MCA4;P16422	Epithelial cell adhesion molecule	EPCAM	3	1	1	0	0	0	0	1	1	0	0	0	0	0	0	1	1	0	0	5.5	5.5	20.954	199	22.382	0	0	0	0	5.5	5.5	0	0	2222900	0	0	0	0	0	2222900	0	0
C9JPH9;C9JFC0;A0A0A0MSB2;Q16658	C9JPH9;C9JFC0;A0A0A0MSB2;Q16658	Fascin	FSCN1	4	1	1	1	0	0	0	0	0	0	0	1	0	0	0	0	0	0	0	8.3	8.3	13.53	120	6.678	8.3	0	0	0	0	0	0	0	8051900	8051900	0	0	0	0	0	0	0
C9JTK6;J3KQ32;Q9NTK5	C9JTK6;J3KQ32;Q9NTK5	Obg-like ATPase 1	OLA1	3	1	1	0	0	0	0	1	0	0	0	0	0	0	0	1	0	0	0	12.9	12.9	12.302	116	31.289	0	0	0	0	12.9	0	0	0	8032100	0	0	0	0	8032100	0	0	0
C9JU35;Q9NPL8	C9JU35;Q9NPL8	Complex I assembly factor TIMMDC1, mitochondrial	TIMMDC1	2	1	1	0	0	0	0	0	0	1	0	0	0	0	0	0	0	1	0	9.9	9.9	17.459	151	10.162	0	0	0	0	0	0	9.9	0	7331500	0	0	0	0	0	0	7331500	0
C9K0G7;C9JM78;C9JQ90;A0A0G2JRX6;E9PCG9;Q02338	C9K0G7;C9JM78;C9JQ90;A0A0G2JRX6;E9PCG9;Q02338	D-beta-hydroxybutyrate dehydrogenase, mitochondrial	BDH1	6	1	1	0	0	0	0	0	0	1	0	0	0	0	0	0	0	1	0	5.4	5.4	18.444	166	6.7434	0	0	0	0	0	0	5.4	0	14757000	0	0	0	0	0	0	14757000	0
D6RAE9;D6RDG7;S4R2X2;D6RFI0;Q9H9B4	D6RAE9;D6RDG7;S4R2X2;D6RFI0;Q9H9B4	Sideroflexin-1	SFXN1	5	1	1	0	0	0	0	0	0	1	0	0	0	0	0	0	0	1	0	23.2	23.2	6.5954	56	6.3731	0	0	0	0	0	0	23.2	0	4083800	0	0	0	0	0	0	4083800	0
D6RAX7;D6RFN0;Q9BT78	D6RAX7;D6RFN0;Q9BT78	COP9 signalosome complex subunit 4	COPS4	3	1	1	0	0	0	0	1	0	0	0	0	0	0	0	1	0	0	0	2.9	2.9	47.726	420	7.2248	0	0	0	0	2.9	0	0	0	8728700	0	0	0	0	8728700	0	0	0
D6RDY0;A0A0J9YWD4;F8W6W8;D6RA03;Q9UQ26	D6RDY0;A0A0J9YWD4;F8W6W8;D6RA03;Q9UQ26	Regulating synaptic membrane exocytosis protein 2	RIMS2	5	1	1	0	0	0	0	1	0	0	0	0	0	0	0	1	0	0	0	1.7	1.7	77.208	665	-2	0	0	0	0	1.7	0	0	0	5225900	0	0	0	0	5225900	0	0	0
E5RHJ2;E5RG56;Q12797	E5RHJ2;E5RG56;Q12797	Aspartyl/asparaginyl beta-hydroxylase	ASPH	3	1	1	1	0	0	0	0	0	0	0	1	0	0	0	0	0	0	0	22.1	22.1	11.787	113	12.976	22.1	0	0	0	0	0	0	0	24917000	24917000	0	0	0	0	0	0	0
E5RHW4;O94905;E5RJ09	E5RHW4;O94905	Erlin-2	ERLIN2	3	3	1	0	0	0	0	3	0	0	0	0	0	0	0	1	0	0	0	10.7	3.6	37.725	338	6.7887	0	0	0	0	10.7	0	0	0	0	0	0	0	0	0	0	0	0
E5RIP1;E5RJX2;P60866	E5RIP1;E5RJX2;P60866	40S ribosomal protein S20	RPS20	3	1	1	1	0	0	0	0	0	0	0	1	0	0	0	0	0	0	0	23.9	23.9	5.4292	46	6.8466	23.9	0	0	0	0	0	0	0	8170400	8170400	0	0	0	0	0	0	0
E9PLA9;G3V153;Q14444	E9PLA9;G3V153;Q14444	Caprin-1	CAPRIN1	3	1	1	0	1	0	0	0	0	0	0	0	1	0	0	0	0	0	0	5.9	5.9	20.236	186	7.2208	0	5.9	0	0	0	0	0	0	12739000	0	12739000	0	0	0	0	0	0
E9PMI6;E9PJF4;J3KN38;P54105	E9PMI6;E9PJF4;J3KN38;P54105	Methylosome subunit pICln	CLNS1A	4	1	1	0	0	0	0	0	0	1	0	0	0	0	0	0	0	1	0	7.8	7.8	18.259	167	24.132	0	0	0	0	0	0	7.8	0	20261000	0	0	0	0	0	0	20261000	0
F2Z3J2;Q16401	F2Z3J2;Q16401	26S proteasome non-ATPase regulatory subunit 5	PSMD5	2	1	1	1	0	0	0	0	0	0	0	1	0	0	0	0	0	0	0	12.5	12.5	8.2207	72	6.2729	12.5	0	0	0	0	0	0	0	31324000	31324000	0	0	0	0	0	0	0
F5H0K7;F5GWJ5;Q96MS0	F5H0K7;F5GWJ5;Q96MS0	Roundabout homolog 3	ROBO3	3	1	1	0	0	0	0	0	0	0	1	0	0	0	0	0	0	0	1	6.7	6.7	16.383	149	-2	0	0	0	0	0	0	0	6.7	281440000	0	0	0	0	0	0	0	281440000
F5H1D4	F5H1D4		ANKLE2	1	1	1	0	0	1	0	0	0	0	0	0	0	1	0	0	0	0	0	3.5	3.5	28.383	258	-2	0	0	3.5	0	0	0	0	0	7193700	0	0	7193700	0	0	0	0	0
F5H5D3;Q9BQE3;F8VVB9;A0A1W2PQM2;F8VRZ4;F8VS66;C9JDS9;F8VWV9;F8VX09;F8VRK0;F8VXZ7;F8W0F6	F5H5D3;Q9BQE3;F8VVB9;A0A1W2PQM2	Tubulin alpha-1C chain	TUBA1C;TUBA1B	12	20	1	20	4	2	1	3	0	0	0	1	0	0	0	0	0	0	0	45.5	3.3	57.73	519	24.406	45.5	9.6	4.4	1.7	6.2	0	0	0	668450000	668450000	0	0	0	0	0	0	0
F5H7J9;O75581	F5H7J9;O75581	Low-density lipoprotein receptor-related protein 6	LRP6	2	1	1	0	0	0	1	0	0	0	0	0	0	0	1	0	0	0	0	0.7	0.7	175.43	1568	6.2699	0	0	0	0.7	0	0	0	0	3723200	0	0	0	3723200	0	0	0	0
F8VUG2;F8W1U3;CON__P05787;P05787;F8VP67;CON__H-INV:HIT000292931	F8VUG2;F8W1U3;CON__P05787;P05787;F8VP67	Keratin, type II cytoskeletal 8	KRT8	6	9	1	5	5	5	4	5	6	4	3	1	0	0	0	0	0	0	0	15.8	4.4	30.906	273	6.5582	11.4	7	7	7	7	11.4	7	7	14445000	14445000	0	0	0	0	0	0	0
F8W1N5;F8VZJ2;F8VNW4;F8W0W4;H0YHX9;Q13765;E9PAV3	F8W1N5;F8VZJ2;F8VNW4;F8W0W4;H0YHX9;Q13765;E9PAV3	Nascent polypeptide-associated complex subunit alpha;Nascent polypeptide-associated complex subunit alpha, muscle-specific form	NACA	7	1	1	1	0	0	0	0	0	0	0	1	0	0	0	0	0	0	0	21.1	21.1	7.813	71	9.8486	21.1	0	0	0	0	0	0	0	12432000	12432000	0	0	0	0	0	0	0
F8W9E7;Q96BJ8	F8W9E7;Q96BJ8	Engulfment and cell motility protein 3	ELMO3	2	1	1	0	0	0	0	0	0	0	1	0	0	0	0	0	0	0	1	2.5	2.5	85.332	756	6.2982	0	0	0	0	0	0	0	2.5	0	0	0	0	0	0	0	0	0
G3V4M9;Q13572	G3V4M9;Q13572	Inositol-tetrakisphosphate 1-kinase	ITPK1	2	1	1	0	0	0	0	1	0	0	0	0	0	0	0	1	0	0	0	4.4	4.4	31.717	295	8.6822	0	0	0	0	4.4	0	0	0	0	0	0	0	0	0	0	0	0
H0Y400;A0A140T9X3;A0A0G2JJZ9;Q5STU3;O00148;Q13838	H0Y400;A0A140T9X3;A0A0G2JJZ9;Q5STU3;O00148;Q13838	ATP-dependent RNA helicase DDX39A;Spliceosome RNA helicase DDX39B	DDX39B;DDX39A	6	1	1	1	0	0	0	0	0	0	0	1	0	0	0	0	0	0	0	5.3	5.3	21.679	187	10.528	5.3	0	0	0	0	0	0	0	37508000	37508000	0	0	0	0	0	0	0
H0Y7U8;H0Y470;A0A2R8YDS8;A0A2R8Y7D4;A0A2R8YGU1;A0A2R8YCU9;A0A2R8Y885;A0A2R8Y820;H7C2C6;A0A2R8Y4X4;A0A2R8Y4W8;A0A2R8YG73;A0A2R8Y7B1;A0A2U3TZV9;Q3V6T2	H0Y7U8;H0Y470;A0A2R8YDS8;A0A2R8Y7D4;A0A2R8YGU1;A0A2R8YCU9;A0A2R8Y885;A0A2R8Y820;H7C2C6;A0A2R8Y4X4;A0A2R8Y4W8;A0A2R8YG73;A0A2R8Y7B1;A0A2U3TZV9;Q3V6T2	Girdin	CCDC88A	15	1	1	0	0	1	0	0	0	0	0	0	0	1	0	0	0	0	0	1.6	1.6	83.381	736	6.3787	0	0	1.6	0	0	0	0	0	2407400	0	0	2407400	0	0	0	0	0
H0Y9B0;H0YA18;Q9NUQ7	H0Y9B0;H0YA18;Q9NUQ7	Ufm1-specific protease 2	UFSP2	3	1	1	1	0	0	0	0	0	0	0	1	0	0	0	0	0	0	0	7.6	7.6	22.278	197	6.8619	7.6	0	0	0	0	0	0	0	7399000	7399000	0	0	0	0	0	0	0
H0YB86;H0YAR2;A0A087WTT1;E7EQV3;E7ERJ7;Q9H361;P11940	H0YB86;H0YAR2;A0A087WTT1;E7EQV3;E7ERJ7;Q9H361;P11940	Polyadenylate-binding protein;Polyadenylate-binding protein 3;Polyadenylate-binding protein 1	PABPC1;PABPC3	7	1	1	0	0	0	0	0	0	0	1	0	0	0	0	0	0	0	1	8.5	8.5	17.985	165	8.3472	0	0	0	0	0	0	0	8.5	25141000	0	0	0	0	0	0	0	25141000
H0YBR2;H0YBB3;A0A2U3TZN9;Q6NXG1;Q9H6T0	H0YBR2;H0YBB3;A0A2U3TZN9;Q6NXG1;Q9H6T0	Epithelial splicing regulatory protein 1;Epithelial splicing regulatory protein 2	ESRP1;ESRP2	5	1	1	0	0	0	0	0	0	0	1	0	0	0	0	0	0	0	1	2.4	2.4	56.035	502	7.3727	0	0	0	0	0	0	0	2.4	20010000	0	0	0	0	0	0	0	20010000
H0YDF9	H0YDF9		SCRIB	1	2	1	0	0	0	2	0	0	0	0	0	0	0	1	0	0	0	0	11.4	5	14.865	140	8.1188	0	0	0	11.4	0	0	0	0	0	0	0	0	0	0	0	0	0
H0YHV5;P56192	H0YHV5;P56192	Methionine--tRNA ligase, cytoplasmic	MARS	2	1	1	0	1	0	0	0	0	0	0	0	1	0	0	0	0	0	0	4.7	4.7	26.587	233	6.7049	0	4.7	0	0	0	0	0	0	3403900	0	3403900	0	0	0	0	0	0
H0YIM6;H0YHT2;A0A1B0GV47;Q7Z4S6	H0YIM6;H0YHT2;A0A1B0GV47;Q7Z4S6	Kinesin-like protein KIF21A	KIF21A	4	1	1	0	1	0	0	0	0	0	0	0	1	0	0	0	0	0	0	2.1	2.1	53.357	475	-2	0	2.1	0	0	0	0	0	0	8491500	0	8491500	0	0	0	0	0	0
H3BQ94;Q9UFM8;Q9Y639	H3BQ94;Q9UFM8;Q9Y639	Neuroplastin	NPTN;DKFZp566H1924	3	1	1	1	0	0	0	0	0	0	0	1	0	0	0	0	0	0	0	6.6	6.6	17.244	152	6.8393	6.6	0	0	0	0	0	0	0	27468000	27468000	0	0	0	0	0	0	0
H3BRK5;H3BMW1;H3BNF0;Q9Y5Y2	H3BRK5;H3BMW1;H3BNF0;Q9Y5Y2	Cytosolic Fe-S cluster assembly factor NUBP2	NUBP2	4	1	1	0	0	0	0	0	0	1	0	0	0	0	0	0	0	1	0	30.4	30.4	4.6795	46	6.7095	0	0	0	0	0	0	30.4	0	0	0	0	0	0	0	0	0	0
H7C0R3;B4DDN1;A0A1B0GVU9;P47897	H7C0R3;B4DDN1;A0A1B0GVU9;P47897	Glutamine--tRNA ligase	QARS	4	1	1	0	1	0	0	0	0	0	0	0	1	0	0	0	0	0	0	3.6	3.6	28.565	253	6.5016	0	3.6	0	0	0	0	0	0	0	0	0	0	0	0	0	0	0
H7C0V9;A0A0A0MRG2;E9PG40;P05067	H7C0V9;A0A0A0MRG2;E9PG40;P05067	Amyloid beta A4 protein;N-APP;Soluble APP-alpha;Soluble APP-beta;C99;Beta-amyloid protein 42;Beta-amyloid protein 40;C83;P3(42);P3(40);C80;Gamma-secretase C-terminal fragment 59;Gamma-secretase C-terminal fragment 57;Gamma-secretase C-terminal fragment 50;C31	APP	4	1	1	0	1	0	0	0	0	0	0	0	1	0	0	0	0	0	0	2.5	2.5	54.981	485	6.5705	0	2.5	0	0	0	0	0	0	6129500	0	6129500	0	0	0	0	0	0
J3KN67;P06753	J3KN67;P06753	Tropomyosin alpha-3 chain	TPM3	2	4	1	0	0	0	0	0	0	4	0	0	0	0	0	0	0	1	0	12.3	4.6	33.222	285	24.702	0	0	0	0	0	0	12.3	0	25685000	0	0	0	0	0	0	25685000	0
J3QL22;J3QS85;J3KTQ1;J3QKR0;C9JLV5;Q9UNS2	J3QL22;J3QS85;J3KTQ1;J3QKR0;C9JLV5;Q9UNS2	COP9 signalosome complex subunit 3	COPS3	6	1	1	0	0	0	0	1	0	0	0	0	0	0	0	1	0	0	0	60	60	2.1494	20	64.97	0	0	0	0	60	0	0	0	22694000	0	0	0	0	22694000	0	0	0
J3QLR7;P62314	J3QLR7;P62314	Small nuclear ribonucleoprotein Sm D1	SNRPD1	2	1	1	1	0	0	0	0	0	0	0	1	0	0	0	0	0	0	0	25	25	5.3284	44	6.4828	25	0	0	0	0	0	0	0	4722900	4722900	0	0	0	0	0	0	0
J3QRX9;J3QRX4;Q9NQ92	J3QRX9;J3QRX4;Q9NQ92	Coordinator of PRMT5 and differentiation stimulator	COPRS	3	1	1	0	0	0	0	0	0	1	0	0	0	0	0	0	0	1	0	26.5	26.5	7.2945	68	9.3207	0	0	0	0	0	0	26.5	0	2676300	0	0	0	0	0	0	2676300	0
J3QT77;A0A0J9YYG4;A0A0J9YXF2;Q15165	J3QT77;A0A0J9YYG4;A0A0J9YXF2;Q15165	Serum paraoxonase/arylesterase 2	PON2	4	1	1	0	0	0	0	1	0	0	0	0	0	0	0	1	0	0	0	2.6	2.6	37.98	342	6.7994	0	0	0	0	2.6	0	0	0	6374000	0	0	0	0	6374000	0	0	0
K7EJ44;P07737	K7EJ44;P07737	Profilin-1	PFN1	2	1	1	1	0	0	0	0	0	0	0	1	0	0	0	0	0	0	0	9.6	9.6	11.39	104	6.2683	9.6	0	0	0	0	0	0	0	4290400	4290400	0	0	0	0	0	0	0
K7EM13;K7EPB2;P10644	K7EM13;K7EPB2;P10644	cAMP-dependent protein kinase type I-alpha regulatory subunit;cAMP-dependent protein kinase type I-alpha regulatory subunit, N-terminally processed	PRKAR1A	3	1	1	1	0	0	0	0	0	0	0	1	0	0	0	0	0	0	0	7.8	7.8	17.347	153	16.74	7.8	0	0	0	0	0	0	0	0	0	0	0	0	0	0	0	0
K7ESE8;J3KSD8;K7ES02;Q13867	K7ESE8;J3KSD8;K7ES02;Q13867	Bleomycin hydrolase	BLMH	4	1	1	1	0	0	0	0	0	1	0	1	0	0	0	0	0	1	0	4.8	4.8	26.738	231	7.1499	4.8	0	0	0	0	0	4.8	0	15787000	15787000	0	0	0	0	0	0	0
M0R1Y5;M0R010;M0QYT7;V9GZ50;Q9ULX6	M0R1Y5;M0R010;M0QYT7;V9GZ50;Q9ULX6	A-kinase anchor protein 8-like	AKAP8L	5	1	1	0	1	0	0	0	0	0	0	0	1	0	0	0	0	0	0	9.2	9.2	12.325	109	6.3678	0	9.2	0	0	0	0	0	0	5547200	0	5547200	0	0	0	0	0	0
M0R2D9;E9PR62;O94973;O95782	M0R2D9;E9PR62;O94973;O95782	AP-2 complex subunit alpha-2;AP-2 complex subunit alpha-1	AP2A1;AP2A2	4	1	1	0	1	0	0	0	0	0	0	0	1	0	0	0	0	0	0	17.5	17.5	6.2502	57	11.54	0	17.5	0	0	0	0	0	0	0	0	0	0	0	0	0	0	0
M0R300;M0R0P8;Q13459	M0R300;M0R0P8;Q13459	Unconventional myosin-IXb	MYO9B	3	1	1	0	0	1	0	0	0	0	0	0	0	1	0	0	0	0	0	0.6	0.6	234.07	2071	8.4831	0	0	0.6	0	0	0	0	0	4394600	0	0	4394600	0	0	0	0	0
O00232	O00232	26S proteasome non-ATPase regulatory subunit 12	PSMD12	1	1	1	1	0	0	0	0	0	0	0	1	0	0	0	0	0	0	0	2.9	2.9	52.904	456	7.6339	2.9	0	0	0	0	0	0	0	10889000	10889000	0	0	0	0	0	0	0
O00487	O00487	26S proteasome non-ATPase regulatory subunit 14	PSMD14	1	1	1	0	0	0	0	0	1	0	0	0	0	0	0	0	1	0	0	4.2	4.2	34.577	310	7.3889	0	0	0	0	0	4.2	0	0	9857200	0	0	0	0	0	9857200	0	0
O00767	O00767	Acyl-CoA desaturase	SCD	1	1	1	0	0	0	0	0	1	1	0	0	0	0	0	0	1	1	0	7	7	41.522	359	9.9241	0	0	0	0	0	7	7	0	46773000	0	0	0	0	0	15300000	31473000	0
O15427	O15427	Monocarboxylate transporter 4	SLC16A3	1	1	1	0	0	0	0	0	1	0	0	0	0	0	0	0	1	0	0	2.8	2.8	49.469	465	9.9747	0	0	0	0	0	2.8	0	0	8165200	0	0	0	0	0	8165200	0	0
O43739	O43739	Cytohesin-3	CYTH3	1	1	1	0	0	0	0	1	0	0	0	0	0	0	0	1	0	0	0	2.5	2.5	46.348	400	6.7113	0	0	0	0	2.5	0	0	0	3338300	0	0	0	0	3338300	0	0	0
O75746	O75746	Calcium-binding mitochondrial carrier protein Aralar1	SLC25A12	1	2	1	0	0	0	0	0	0	0	2	0	0	0	0	0	0	0	1	2.9	1.2	74.761	678	6.9273	0	0	0	0	0	0	0	2.9	0	0	0	0	0	0	0	0	0
O95297	O95297	Myelin protein zero-like protein 1	MPZL1	1	1	1	0	0	0	0	1	0	0	0	0	0	0	0	1	0	0	0	3.7	3.7	29.082	269	7.4639	0	0	0	0	3.7	0	0	0	5691300	0	0	0	0	5691300	0	0	0
P02751	P02751	Fibronectin;Anastellin;Ugl-Y1;Ugl-Y2;Ugl-Y3	FN1	1	1	1	0	0	1	0	0	0	0	0	0	0	1	0	0	0	0	0	0.5	0.5	262.62	2386	6.4216	0	0	0.5	0	0	0	0	0	2685400	0	0	2685400	0	0	0	0	0
P04040	P04040	Catalase	CAT	1	1	1	0	1	1	0	0	1	1	0	0	1	1	0	0	1	1	0	2.5	2.5	59.755	527	9.076	0	2.5	2.5	0	0	2.5	2.5	0	32502000	0	6726400	7027100	0	0	15373000	3375700	0
P08574	P08574	Cytochrome c1, heme protein, mitochondrial	CYC1	1	1	1	0	0	0	0	0	0	1	0	0	0	0	0	0	0	1	0	3.7	3.7	35.422	325	15.705	0	0	0	0	0	0	3.7	0	30554000	0	0	0	0	0	0	30554000	0
P08581	P08581	Hepatocyte growth factor receptor	MET	1	1	1	0	0	0	0	1	0	0	0	0	0	0	0	1	0	0	0	0.8	0.8	155.54	1390	6.6462	0	0	0	0	0.8	0	0	0	10059000	0	0	0	0	10059000	0	0	0
P0CW24	P0CW24	Paraneoplastic antigen-like protein 6A	PNMA6A	1	1	1	1	0	0	0	0	0	0	0	1	0	0	0	0	0	0	0	2.8	2.8	43.875	399	-2	2.8	0	0	0	0	0	0	0	5064900	5064900	0	0	0	0	0	0	0
P10745	P10745	Retinol-binding protein 3	RBP3	1	1	1	0	0	0	0	0	0	1	0	0	0	0	0	0	0	1	0	0.6	0.6	135.36	1247	9.9989	0	0	0	0	0	0	0.6	0	47247000	0	0	0	0	0	0	47247000	0
P11166	P11166	Solute carrier family 2, facilitated glucose transporter member 1	SLC2A1	1	1	1	1	1	0	0	0	0	0	0	1	1	0	0	0	0	0	0	1.6	1.6	54.083	492	6.4532	1.6	1.6	0	0	0	0	0	0	6393400	6393400	0	0	0	0	0	0	0
P12235;V9GYG0	P12235;V9GYG0	ADP/ATP translocase 1	SLC25A4	2	8	1	1	0	0	0	2	0	8	0	0	0	0	0	0	0	1	0	28.2	4.4	33.064	298	-2	3.4	0	0	0	6.7	0	28.2	0	4669000	0	0	0	0	0	0	4669000	0
P12236	P12236	ADP/ATP translocase 3;ADP/ATP translocase 3, N-terminally processed	SLC25A6	1	9	1	1	0	0	0	2	0	9	0	0	0	0	0	0	0	1	0	29.9	3	32.866	298	17.501	3.4	0	0	0	6.7	0	29.9	0	291890000	0	0	0	0	0	0	291890000	0
P22626;F8VTQ5;A0A087WUI2;A0A2R8Y4L2	P22626;F8VTQ5;A0A087WUI2;A0A2R8Y4L2	Heterogeneous nuclear ribonucleoproteins A2/B1	HNRNPA2B1;HNRNPA1	4	2	1	2	0	0	0	0	0	0	0	1	0	0	0	0	0	0	0	5.4	2.8	37.429	353	14.38	5.4	0	0	0	0	0	0	0	3306900	3306900	0	0	0	0	0	0	0
P25311	P25311	Zinc-alpha-2-glycoprotein	AZGP1	1	1	1	1	1	0	0	0	1	0	0	1	1	0	0	0	1	0	0	3.4	3.4	34.258	298	6.3135	3.4	3.4	0	0	0	3.4	0	0	24478000	5764000	12455000	0	0	0	6258800	0	0
P26232;A0A0A0MRI5;A0A0A0MTJ6;C9IZ88;H0YBB8;C9J144	P26232;A0A0A0MRI5	Catenin alpha-2	CTNNA2	6	10	1	0	10	0	0	0	0	0	0	0	1	0	0	0	0	0	0	12.9	1.9	105.31	953	15.669	0	12.9	0	0	0	0	0	0	128680000	0	128680000	0	0	0	0	0	0
P31153	P31153	S-adenosylmethionine synthase isoform type-2	MAT2A	1	1	1	0	0	0	0	1	0	0	0	0	0	0	0	1	0	0	0	3.8	3.8	43.66	395	13.592	0	0	0	0	3.8	0	0	0	35473000	0	0	0	0	35473000	0	0	0
P32119;A6NIW5	P32119;A6NIW5	Peroxiredoxin-2	PRDX2	2	2	1	1	1	1	1	1	2	1	0	0	0	0	0	0	1	0	0	10.6	5.1	21.892	198	6.421	5.6	5.6	5.6	5.6	5.6	10.6	5.6	0	0	0	0	0	0	0	0	0	0
P35908	P35908	Keratin, type II cytoskeletal 2 epidermal	KRT2	1	64	1	48	49	49	41	37	43	40	28	1	0	1	0	0	1	1	0	91.5	4.7	65.432	639	323.31	75.3	80.9	78.2	61.5	59.6	64.2	67.3	48.8	105110000000	17581000000	20778000000	19035000000	5894300000	4651300000	17392000000	10251000000	9528400000
P50416	P50416	Carnitine O-palmitoyltransferase 1, liver isoform	CPT1A	1	1	1	0	0	0	0	0	0	0	1	0	0	0	0	0	0	0	1	1.2	1.2	88.367	773	7.5088	0	0	0	0	0	0	0	1.2	41005000	0	0	0	0	0	0	0	41005000
P51991	P51991	Heterogeneous nuclear ribonucleoprotein A3	HNRNPA3	1	1	1	0	0	0	0	1	0	0	0	0	0	0	0	1	0	0	0	2.6	2.6	39.594	378	9.1914	0	0	0	0	2.6	0	0	0	0	0	0	0	0	0	0	0	0
P57078	P57078	Receptor-interacting serine/threonine-protein kinase 4	RIPK4	1	1	1	0	1	0	0	0	0	0	0	0	1	0	0	0	0	0	0	1.1	1.1	91.61	832	6.6452	0	1.1	0	0	0	0	0	0	5241500	0	5241500	0	0	0	0	0	0
P61981	P61981	14-3-3 protein gamma;14-3-3 protein gamma, N-terminally processed	YWHAG	1	1	1	0	0	0	0	0	0	1	0	0	0	0	0	0	0	1	0	5.7	5.7	28.302	247	10.345	0	0	0	0	0	0	5.7	0	7591200	0	0	0	0	0	0	7591200	0
P63151;Q66LE6	P63151;Q66LE6	Serine/threonine-protein phosphatase 2A 55 kDa regulatory subunit B alpha isoform;Serine/threonine-protein phosphatase 2A 55 kDa regulatory subunit B delta isoform	PPP2R2A;PPP2R2D	2	1	1	1	0	0	0	0	0	0	0	1	0	0	0	0	0	0	0	2.5	2.5	51.691	447	12.303	2.5	0	0	0	0	0	0	0	0	0	0	0	0	0	0	0	0
P68133;P68032;P63267;P62736;A6NL76;F8WB63;B8ZZJ2;C9JFL5;F6UVQ4;F6QUT6	P68133;P68032;P63267;P62736;A6NL76;F8WB63;B8ZZJ2;C9JFL5;F6UVQ4;F6QUT6	Actin, alpha skeletal muscle;Actin, alpha cardiac muscle 1;Actin, gamma-enteric smooth muscle;Actin, aortic smooth muscle	ACTA1;ACTC1;ACTG2;ACTA2	10	11	1	1	1	0	1	11	1	1	0	0	0	0	0	1	0	0	0	29.7	4.2	42.051	377	-2	2.9	2.9	0	2.9	29.7	4.2	2.9	0	14171000	0	0	0	0	14171000	0	0	0
P68371	P68371	Tubulin beta-4B chain	TUBB4B	1	21	1	21	1	0	0	0	0	0	0	1	0	0	0	0	0	0	0	65.2	2.7	49.83	445	66.959	65.2	2.2	0	0	0	0	0	0	900960000	900960000	0	0	0	0	0	0	0
P98172	P98172	Ephrin-B1	EFNB1	1	1	1	1	0	0	0	0	0	0	0	1	0	0	0	0	0	0	0	3.8	3.8	38.006	346	7.3085	3.8	0	0	0	0	0	0	0	9284000	9284000	0	0	0	0	0	0	0
Q01469	Q01469	Fatty acid-binding protein, epidermal	FABP5	1	1	1	1	1	1	0	1	0	0	0	1	1	1	0	1	0	0	0	6.7	6.7	15.164	135	7.324	6.7	6.7	6.7	0	6.7	0	0	0	67501000	11343000	22034000	21298000	0	12826000	0	0	0
Q07092	Q07092	Collagen alpha-1(XVI) chain	COL16A1	1	1	1	0	1	0	0	0	0	0	1	0	1	0	0	0	0	0	1	1	1	157.75	1604	6.6934	0	1	0	0	0	0	0	1	4183100000	0	71455000	0	0	0	0	0	4111600000
Q13885	Q13885	Tubulin beta-2A chain	TUBB2A	1	18	1	18	1	0	0	0	0	0	0	1	0	0	0	0	0	0	0	52.6	2.7	49.906	445	7.4212	52.6	2.2	0	0	0	0	0	0	35865000	35865000	0	0	0	0	0	0	0
Q14008	Q14008	Cytoskeleton-associated protein 5	CKAP5	1	1	1	0	0	1	0	0	0	0	0	0	0	1	0	0	0	0	0	0.6	0.6	225.49	2032	7.7264	0	0	0.6	0	0	0	0	0	3465500	0	0	3465500	0	0	0	0	0
Q14681	Q14681	BTB/POZ domain-containing protein KCTD2	KCTD2	1	1	1	0	0	0	0	0	0	1	0	0	0	0	0	0	0	1	0	4.6	4.6	28.527	263	6.5852	0	0	0	0	0	0	4.6	0	12366000	0	0	0	0	0	0	12366000	0
Q15084	Q15084	Protein disulfide-isomerase A6	PDIA6	1	1	1	1	0	0	0	0	0	0	0	1	0	0	0	0	0	0	0	3.2	3.2	48.121	440	10.257	3.2	0	0	0	0	0	0	0	18639000	18639000	0	0	0	0	0	0	0
Q15223	Q15223	Nectin-1	PVRL1	1	1	1	0	1	0	0	0	0	0	0	0	1	0	0	0	0	0	0	2.7	2.7	57.157	517	10.282	0	2.7	0	0	0	0	0	0	27618000	0	27618000	0	0	0	0	0	0
Q15427	Q15427	Splicing factor 3B subunit 4	SF3B4	1	1	1	1	0	0	0	0	0	0	0	1	0	0	0	0	0	0	0	3.3	3.3	44.385	424	9.7562	3.3	0	0	0	0	0	0	0	7023900	7023900	0	0	0	0	0	0	0
Q15773	Q15773	Myeloid leukemia factor 2	MLF2	1	1	1	0	0	0	0	0	0	1	0	0	0	0	0	0	0	1	0	4.8	4.8	28.147	248	6.5195	0	0	0	0	0	0	4.8	0	17100000	0	0	0	0	0	0	17100000	0
Q2L6G8;G8JLG2;Q15517	Q2L6G8;G8JLG2;Q15517	Corneodesmosin	CDSN	3	1	1	0	0	0	0	0	1	0	0	0	0	0	0	0	1	0	0	3.4	3.4	51.539	529	9.4496	0	0	0	0	0	3.4	0	0	13637000	0	0	0	0	0	13637000	0	0
Q3ZCM7;A0A075B736;Q5SQY0	Q3ZCM7;A0A075B736;Q5SQY0	Tubulin beta-8 chain	TUBB8	3	9	1	9	0	0	0	0	0	0	0	1	0	0	0	0	0	0	0	24.3	7.2	49.775	444	6.6471	24.3	0	0	0	0	0	0	0	38593000	38593000	0	0	0	0	0	0	0
Q4VY20;A0A0J9YWZ2;Q4VY19;A0A0J9YWE8;P31946	Q4VY20;A0A0J9YWZ2;Q4VY19;A0A0J9YWE8;P31946	14-3-3 protein beta/alpha;14-3-3 protein beta/alpha, N-terminally processed	YWHAB	5	1	1	0	0	0	0	0	0	1	0	0	0	0	0	0	0	1	0	18.9	18.9	8.4284	74	6.9459	0	0	0	0	0	0	18.9	0	10342000	0	0	0	0	0	0	10342000	0
Q58FF8	Q58FF8	Putative heat shock protein HSP 90-beta 2	HSP90AB2P	1	5	1	0	5	0	0	0	0	0	0	0	1	0	0	0	0	0	0	13.6	3.9	44.348	381	7.5801	0	13.6	0	0	0	0	0	0	9739700	0	9739700	0	0	0	0	0	0
Q5RKV6	Q5RKV6	Exosome complex component MTR3	EXOSC6	1	1	1	0	0	0	0	0	0	1	0	0	0	0	0	0	0	1	0	5.9	5.9	28.235	272	10.34	0	0	0	0	0	0	5.9	0	6630000	0	0	0	0	0	0	6630000	0
Q5T0T0	Q5T0T0	E3 ubiquitin-protein ligase MARCH8	2019-03-08	1	1	1	1	0	0	0	1	0	0	0	1	0	0	0	1	0	0	0	2.7	2.7	32.965	291	-2	2.7	0	0	0	2.7	0	0	0	56079000	31671000	0	0	0	24408000	0	0	0
Q5T2B5;A0A0A0MTN0;Q13617	Q5T2B5;A0A0A0MTN0;Q13617	Cullin-2	CUL2	3	1	1	0	1	0	0	0	0	0	0	0	1	0	0	0	0	0	0	1.3	1.3	82.358	706	8.3648	0	1.3	0	0	0	0	0	0	0	0	0	0	0	0	0	0	0
Q5TG12;E9PGC5;Q15262	Q5TG12;E9PGC5;Q15262	Protein-tyrosine-phosphatase;Receptor-type tyrosine-protein phosphatase kappa	PTPRK	3	1	1	0	0	0	1	0	0	0	0	0	0	0	1	0	0	0	0	0.9	0.9	164.2	1458	7.6966	0	0	0	0.9	0	0	0	0	2690100	0	0	0	2690100	0	0	0	0
Q6P2Q9	Q6P2Q9	Pre-mRNA-processing-splicing factor 8	PRPF8	1	1	1	0	0	1	0	0	0	0	0	0	0	1	0	0	0	0	0	0.6	0.6	273.6	2335	11.279	0	0	0.6	0	0	0	0	0	2071700	0	0	2071700	0	0	0	0	0
Q6P4A7	Q6P4A7	Sideroflexin-4	SFXN4	1	1	1	0	0	0	0	0	1	0	0	0	0	0	0	0	1	0	0	3.6	3.6	37.998	337	7.0643	0	0	0	0	0	3.6	0	0	7436300	0	0	0	0	0	7436300	0	0
Q71U36;P0DPH8;P0DPH7;Q6PEY2;F8VQQ4	Q71U36;P0DPH8;P0DPH7;Q6PEY2;F8VQQ4	Tubulin alpha-1A chain;Tubulin alpha-3E chain	TUBA1A;TUBA3E	5	20	1	20	3	1	1	2	0	0	0	1	0	0	0	0	0	0	0	52.3	3.1	50.135	451	9.4292	52.3	8	2	2	4	0	0	0	11803000	11803000	0	0	0	0	0	0	0
Q86UL3	Q86UL3	Glycerol-3-phosphate acyltransferase 4	AGPAT6	1	1	1	0	0	0	0	1	0	0	0	0	0	0	0	1	0	0	0	2.6	2.6	52.07	456	13.594	0	0	0	0	2.6	0	0	0	0	0	0	0	0	0	0	0	0
Q8N357	Q8N357	Solute carrier family 35 member F6	SLC35F6	1	1	1	0	0	0	0	0	0	1	0	0	0	0	0	0	0	1	0	3.2	3.2	40.214	371	8.7849	0	0	0	0	0	0	3.2	0	38024000	0	0	0	0	0	0	38024000	0
Q8NBN7	Q8NBN7	Retinol dehydrogenase 13	RDH13	1	1	1	0	0	0	0	0	1	0	0	0	0	0	0	0	1	0	0	3.9	3.9	35.932	331	6.9957	0	0	0	0	0	3.9	0	0	3662000	0	0	0	0	0	3662000	0	0
Q8TB37	Q8TB37	Iron-sulfur protein NUBPL	NUBPL	1	1	1	0	0	0	0	0	0	1	0	0	0	0	0	0	0	1	0	2.2	2.2	34.082	319	6.8077	0	0	0	0	0	0	2.2	0	0	0	0	0	0	0	0	0	0
Q8TEJ3	Q8TEJ3	SH3 domain-containing RING finger protein 3	SH3RF3	1	1	1	1	1	1	1	0	1	1	0	1	1	1	1	0	1	1	0	1	1	92.775	882	6.4834	1	1	1	1	0	1	1	0	438850000	102350000	101910000	42979000	42053000	0	46612000	102940000	0
Q96AQ6	Q96AQ6	Pre-B-cell leukemia transcription factor-interacting protein 1	PBXIP1	1	1	1	0	1	0	0	0	0	0	0	0	1	0	0	0	0	0	0	1.5	1.5	80.642	731	7.4983	0	1.5	0	0	0	0	0	0	8001700	0	8001700	0	0	0	0	0	0
Q96EY1	Q96EY1	DnaJ homolog subfamily A member 3, mitochondrial	DNAJA3	1	1	1	0	0	0	0	1	0	0	0	0	0	0	0	1	0	0	0	2.5	2.5	52.488	480	7.3671	0	0	0	0	2.5	0	0	0	9567400	0	0	0	0	9567400	0	0	0
Q96JB2	Q96JB2	Conserved oligomeric Golgi complex subunit 3	COG3	1	1	1	0	1	0	0	0	0	0	0	0	1	0	0	0	0	0	0	1.8	1.8	94.095	828	6.3987	0	1.8	0	0	0	0	0	0	0	0	0	0	0	0	0	0	0
Q96K37	Q96K37	Solute carrier family 35 member E1	SLC35E1	1	1	1	0	0	0	0	0	1	0	0	0	0	0	0	0	1	0	0	5.9	5.9	44.772	410	14.117	0	0	0	0	0	5.9	0	0	27097000	0	0	0	0	0	27097000	0	0
Q96PG2	Q96PG2	Membrane-spanning 4-domains subfamily A member 10	MS4A10	1	1	1	1	1	1	1	1	1	1	1	1	1	1	1	1	1	1	1	3.4	3.4	29.747	267	6.3657	3.4	3.4	3.4	3.4	3.4	3.4	3.4	3.4	2373900000	439000000	549290000	273900000	132600000	211010000	196670000	327920000	243500000
Q9BVA1	Q9BVA1	Tubulin beta-2B chain	TUBB2B	1	18	1	18	1	0	0	0	0	0	0	1	0	0	0	0	0	0	0	53.5	3.6	49.953	445	29.318	53.5	2.2	0	0	0	0	0	0	282760000	282760000	0	0	0	0	0	0	0
Q9H9Y6	Q9H9Y6	DNA-directed RNA polymerase I subunit RPA2	POLR1B	1	1	1	1	0	0	0	0	0	0	0	1	0	0	0	0	0	0	0	0.7	0.7	128.23	1135	-2	0.7	0	0	0	0	0	0	0	26720000	26720000	0	0	0	0	0	0	0
Q9HCM7	Q9HCM7	Fibrosin-1-like protein	FBRSL1	1	1	1	0	1	0	0	0	0	0	0	0	1	0	0	0	0	0	0	0.9	0.9	110.91	1045	-2	0	0.9	0	0	0	0	0	0	6668600	0	6668600	0	0	0	0	0	0
Q9HCN4	Q9HCN4	GPN-loop GTPase 1	GPN1	1	1	1	0	0	0	0	1	0	0	0	0	0	0	0	1	0	0	0	2.9	2.9	41.74	374	10.729	0	0	0	0	2.9	0	0	0	7290100	0	0	0	0	7290100	0	0	0
Q9HCU4	Q9HCU4	Cadherin EGF LAG seven-pass G-type receptor 2	CELSR2	1	1	1	0	0	1	0	0	0	0	0	0	0	1	0	0	0	0	0	0.3	0.3	317.45	2923	7.5618	0	0	0.3	0	0	0	0	0	0	0	0	0	0	0	0	0	0
Q9P0L0	Q9P0L0	Vesicle-associated membrane protein-associated protein A	VAPA	1	1	1	0	0	0	0	0	0	1	0	0	0	0	0	0	0	1	0	6.4	6.4	27.893	249	8.625	0	0	0	0	0	0	6.4	0	29522000	0	0	0	0	0	0	29522000	0
Q9UBF2;Q9Y678	Q9UBF2;Q9Y678	Coatomer subunit gamma-2;Coatomer subunit gamma-1	COPG2;COPG1	2	1	1	0	1	0	0	0	0	0	0	0	1	0	0	0	0	0	0	1.4	1.4	97.621	871	14.978	0	1.4	0	0	0	0	0	0	0	0	0	0	0	0	0	0	0
Q9UBV2	Q9UBV2	Protein sel-1 homolog 1	SEL1L	1	1	1	0	1	0	0	0	0	0	0	0	1	0	0	0	0	0	0	1.3	1.3	88.754	794	9.743	0	1.3	0	0	0	0	0	0	13172000	0	13172000	0	0	0	0	0	0
Q9UKT9	Q9UKT9	Zinc finger protein Aiolos	IKZF3	1	1	1	1	0	0	0	0	0	0	0	1	0	0	0	0	0	0	0	1.8	1.8	58.023	509	-2	1.8	0	0	0	0	0	0	0	6754200	6754200	0	0	0	0	0	0	0
Q9UPY3	Q9UPY3	Endoribonuclease Dicer	DICER1	1	1	1	0	0	1	0	0	0	0	0	0	0	1	0	0	0	0	0	0.6	0.6	218.68	1922	6.6439	0	0	0.6	0	0	0	0	0	2442700	0	0	2442700	0	0	0	0	0
Q9UPY5	Q9UPY5	Cystine/glutamate transporter	SLC7A11	1	1	1	0	0	0	0	0	1	0	0	0	0	0	0	0	1	0	0	1.8	1.8	55.422	501	12.852	0	0	0	0	0	1.8	0	0	19236000	0	0	0	0	0	19236000	0	0
Q9Y2Z0	Q9Y2Z0	Suppressor of G2 allele of SKP1 homolog	SUGT1	1	1	1	0	0	0	0	0	1	0	0	0	0	0	0	0	1	0	0	3.3	3.3	41.024	365	6.5438	0	0	0	0	0	3.3	0	0	3482200	0	0	0	0	0	3482200	0	0
Q9Y426	Q9Y426	C2 domain-containing protein 2	C2CD2	1	1	1	0	1	0	0	0	0	0	0	0	1	0	0	0	0	0	0	1.6	1.6	75.532	696	6.5012	0	1.6	0	0	0	0	0	0	2105000	0	2105000	0	0	0	0	0	0
Q9Y698	Q9Y698	Voltage-dependent calcium channel gamma-2 subunit	CACNG2	1	1	1	0	0	0	0	0	0	0	1	0	0	0	0	0	0	0	1	6.2	6.2	35.965	323	6.5088	0	0	0	0	0	0	0	6.2	48894000	0	0	0	0	0	0	0	48894000
R4GNF4;Q86VU5	R4GNF4;Q86VU5	Catechol O-methyltransferase domain-containing protein 1	COMTD1	2	1	1	0	0	0	0	0	0	1	0	0	0	0	0	0	0	1	0	5.8	5.8	27.747	260	11.152	0	0	0	0	0	0	5.8	0	9296400	0	0	0	0	0	0	9296400	0
U3KQ64;A0A0A0MTJ1;Q14318	U3KQ64;A0A0A0MTJ1;Q14318	Peptidyl-prolyl cis-trans isomerase FKBP8	FKBP8	3	1	1	1	0	0	0	0	0	0	0	1	0	0	0	0	0	0	0	4.4	4.4	19.865	182	21.979	4.4	0	0	0	0	0	0	0	0	0	0	0	0	0	0	0	0
A0A140T9J9;Q29963;A0A1W2PR11;A0A140T962;A0A140T9B3;A2AEA2;P10321;Q29865;P30499;A0A1W2PRU9;A0A140T9E1;A0A140T942;P01893;F8W9Z8;A0A140TA12;A0A140T9Z7;A0A0G2JPT2	A0A140T9J9;Q29963;A0A1W2PR11;A0A140T962;A0A140T9B3;A2AEA2;P10321;Q29865;P30499;A0A1W2PRU9;A0A140T9E1;A0A140T942	HLA class I histocompatibility antigen, Cw-6 alpha chain;HLA class I histocompatibility antigen, Cw-7 alpha chain;HLA class I histocompatibility antigen, Cw-18 alpha chain;HLA class I histocompatibility antigen, Cw-1 alpha chain	HLA-C	17	14	0	0	0	0	0	14	1	0	0	0	0	0	0	0	0	0	0	47.6	0	41.621	372	7.3201	0	0	0	0	47.6	2.4	0	0	26272000	0	0	0	0	26272000	0	0	0
P04350;M0R2D3;M0R278;M0QY85;M0QZL7;M0R0X0;M0QY37;M0QX14;M0QYM7;M0R1I1;M0R042;M0R2T4;A0A075B724	P04350	Tubulin beta-4A chain	TUBB4A	13	17	0	17	1	0	0	0	0	0	0	0	0	0	0	0	0	0	0	54.3	0	49.585	444	19.629	54.3	2.3	0	0	0	0	0	0	11193000	11193000	0	0	0	0	0	0	0
P10316;A0A140T9I0;A0A140T9X5;A0A140T913;P01892;A0A140T955;A0A140T933;A0A1W2PPQ2;A0A1W2PRT9	P10316;A0A140T9I0;A0A140T9X5;A0A140T913;P01892;A0A140T955;A0A140T933;A0A1W2PPQ2;A0A1W2PRT9	HLA class I histocompatibility antigen, A-69 alpha chain;HLA class I histocompatibility antigen, A-2 alpha chain	HLA-A	9	16	0	0	0	0	0	16	0	0	0	0	0	0	0	0	0	0	0	43	0	40.976	365	7.3588	0	0	0	0	43	0	0	0	29163000	0	0	0	0	29163000	0	0	0
P30480;A0A1W2PPR8;P30462;P01889;P30460;A0A140TA21;F6U0H7;A0A140T9D4	P30480;A0A1W2PPR8;P30462;P01889;P30460	HLA class I histocompatibility antigen, B-42 alpha chain;HLA class I histocompatibility antigen, B-14 alpha chain;HLA class I histocompatibility antigen, B-7 alpha chain;HLA class I histocompatibility antigen, B-8 alpha chain	HLA-B	8	13	0	0	0	0	0	13	1	0	0	0	0	0	0	0	0	0	0	37	0	40.332	362	35.711	0	0	0	0	37	2.5	0	0	91097000	0	0	0	0	91097000	0	0	0
P30490;P18464;P30498;P30464;P30495;P30484;P18465;A0A140T9G0;A0A140TA13;A0A140T953	P30490;P18464;P30498;P30464;P30495;P30484;P18465;A0A140T9G0	HLA class I histocompatibility antigen, B-52 alpha chain;HLA class I histocompatibility antigen, B-51 alpha chain;HLA class I histocompatibility antigen, B-78 alpha chain;HLA class I histocompatibility antigen, B-15 alpha chain;HLA class I histocompatibility antigen, B-56 alpha chain;HLA class I histocompatibility antigen, B-46 alpha chain;HLA class I histocompatibility antigen, B-57 alpha chain	HLA-B	10	12	0	0	0	0	0	12	1	0	0	0	0	0	0	0	0	0	0	36.5	0	40.521	362	39.043	0	0	0	0	36.5	2.5	0	0	99262000	0	0	0	0	99262000	0	0	0
P30508;A0A140T912;A0A1W2PRZ0;A0A140T937;A0A140T930;Q07000;A0A1W2PRX1;Q29960;P30505;P30501;A0A1W2PP77;A0A0G2JH50;Q9TNN7;A0A0G2JIF0;A2BF26;Q95604;A0A1W2PS56;P30504;A0A140T9M5;A0A140T9Z4;A0A140TA19;A0A140T9S7;A0A140T9Q4	P30508;A0A140T912;A0A1W2PRZ0;A0A140T937;A0A140T930;Q07000;A0A1W2PRX1;Q29960;P30505;P30501;A0A1W2PP77;A0A0G2JH50;Q9TNN7;A0A0G2JIF0;A2BF26;Q95604;A0A1W2PS56;P30504;A0A140T9M5	HLA class I histocompatibility antigen, Cw-12 alpha chain;HLA class I histocompatibility antigen, Cw-15 alpha chain;HLA class I histocompatibility antigen, Cw-16 alpha chain;HLA class I histocompatibility antigen, Cw-8 alpha chain;HLA class I histocompatibility antigen, Cw-2 alpha chain;HLA class I histocompatibility antigen, Cw-5 alpha chain;HLA class I histocompatibility antigen, Cw-17 alpha ch…	HLA-C	23	16	0	0	0	0	0	16	1	0	0	0	0	0	0	0	0	0	0	53.6	0	40.885	366	272.69	0	0	0	0	53.6	2.5	0	0	1142600000	0	0	0	0	1136800000	5769000	0	0
P68363	P68363	Tubulin alpha-1B chain	TUBA1B	1	20	0	20	4	2	1	3	0	0	0	0	0	0	0	0	0	0	0	52.3	0	50.151	451	205.78	52.3	11.1	5.1	2	7.1	0	0	0	20789000000	20561000000	188260000	7664300	1174800	31115000	0	0	0
